# Supplementary material for: An unexpected feasible route for the formation of organosulfates by the gas phase reaction of sulfuric acid with acetaldehyde catalyzed by dimethylamine in the atmosphere
Source: Royal Society of Chemistry journal article supplement (doi:10.1039/d2ea00159d), 2023-01-01
Supplement: d2ea00159d1.pdf [file d2ea00159d1.pdf]

**An unexpectedly feasible route for the formation of organosulfates by the gas phase reaction of sulfuric acid with acetaldehyde catalyzed by dimethylamine in the atmosphere**

Ju-Rui Yang<sup>a</sup> Ai Liu<sup>b</sup> Bo Long<sup>\*a, b</sup>

<sup>a</sup>Department of Physics, Guizhou University, Guiyang 550025, China

<sup>b</sup>School of Materials Science and Engineering, Guizhou Minzu University, Guiyang, 550025, China.

TABLE OF CONTENTS

|                                                                                                                                                                                                                                                                                                                                                                                                                                                    |      |
|----------------------------------------------------------------------------------------------------------------------------------------------------------------------------------------------------------------------------------------------------------------------------------------------------------------------------------------------------------------------------------------------------------------------------------------------------|------|
| Calculated details for kinetics                                                                                                                                                                                                                                                                                                                                                                                                                    | S3-4 |
| Table S1. T <sub>1</sub> diagnostic values.                                                                                                                                                                                                                                                                                                                                                                                                        | S5   |
| Table S2. The calculated binding energies the dimer complexes.                                                                                                                                                                                                                                                                                                                                                                                     | S6   |
| Table S3. The calculated equilibrium constants and the concentration of the dimer complexes when the [(CH <sub>3</sub> ) <sub>2</sub> NH] = 3.2 × 10 <sup>9</sup> , [H <sub>2</sub> SO <sub>4</sub> ] = 4 × 10 <sup>8</sup> , [CH <sub>3</sub> CHO] = 1.12 × 10 <sup>12</sup> molecule cm <sup>-3</sup> for the H <sub>2</sub> SO <sub>4</sub> + (CH <sub>3</sub> ) <sub>2</sub> NH + CH <sub>3</sub> CHO in the temperature range of 200 - 298 K. | S7   |
| Table S4. The bimolecular rate constants of the CH <sub>3</sub> CHO + H <sub>2</sub> SO <sub>4</sub> reaction.                                                                                                                                                                                                                                                                                                                                     | S8   |
| Table S5. The rate ratio of the CH <sub>3</sub> CHO + H <sub>2</sub> SO <sub>4</sub> + (CH <sub>3</sub> ) <sub>2</sub> NH reaction and the CH <sub>3</sub> CHO + H <sub>2</sub> SO <sub>4</sub> reaction under the temperature range of 200 – 298 K.                                                                                                                                                                                               | S9   |
| Table S6. The rate ratio of the CH <sub>3</sub> CHO + H <sub>2</sub> SO <sub>4</sub> + (CH <sub>3</sub> ) <sub>2</sub> NH reaction and the CH <sub>3</sub> CHO + OH reaction under the H <sub>2</sub> SO <sub>4</sub> concentration of 1.0 × 10 <sup>6</sup> molecules cm <sup>-3</sup> , different OH concentration and the temperature range of 200 – 298 K.                                                                                     | S10  |
| Table S7. The rate ratio of the CH <sub>3</sub> CHO + H <sub>2</sub> SO <sub>4</sub> + (CH <sub>3</sub> ) <sub>2</sub> NH reaction and the CH <sub>3</sub> CHO + OH reaction under the H <sub>2</sub> SO <sub>4</sub> concentration of 1.0 × 10 <sup>7</sup> molecules cm <sup>-3</sup> , different OH concentration and the temperature range of 200 – 298 K.                                                                                     | S11  |
| Table S8. The rate ratio of the CH <sub>3</sub> CHO + H <sub>2</sub> SO <sub>4</sub> + (CH <sub>3</sub> ) <sub>2</sub> NH reaction and the CH <sub>3</sub> CHO + OH reaction under the H <sub>2</sub> SO <sub>4</sub> concentration of 4.0 × 10 <sup>8</sup> molecules cm <sup>-3</sup> , different OH concentration and the temperature range of 200 – 298 K.                                                                                     | S12  |
| Table S9. The rate ratio of the CH <sub>3</sub> CHO + H <sub>2</sub> SO <sub>4</sub> + (CH <sub>3</sub> ) <sub>2</sub> NH reaction and the CH <sub>3</sub> CHO                                                                                                                                                                                                                                                                                     |      |

---

\*Corresponding author: [wwwltcommon@sina.com](mailto:wwwltcommon@sina.com) (Bo Long)

|                                                                                                                                                                                                                                                                                                                                                                       |     |
|-----------------------------------------------------------------------------------------------------------------------------------------------------------------------------------------------------------------------------------------------------------------------------------------------------------------------------------------------------------------------|-----|
| + OH reaction under the H <sub>2</sub> SO <sub>4</sub> concentration of $5.1 \times 10^9$ molecules cm <sup>-3</sup> ,<br>different OH concentration and the temperature range of 200 – 298 K.                                                                                                                                                                        | S13 |
| Table S10. The rate ratio of the CH <sub>3</sub> CHO + H <sub>2</sub> SO <sub>4</sub> + (CH <sub>3</sub> ) <sub>2</sub> NH reaction and the H <sub>2</sub> SO <sub>4</sub> +<br>OH reaction under the CH <sub>3</sub> CHO concentration of $1.12 \times 10^{12}$ molecules cm <sup>-3</sup> ,<br>different OH concentration and the temperature range of 200 – 298 K. | S14 |
| Table S11. The calculated atmospheric lifetime of H <sub>2</sub> SO <sub>4</sub> at the (CH <sub>3</sub> ) <sub>2</sub> NH concentration<br>of $3.2 \times 10^9$ molecules cm <sup>-3</sup> , the CH <sub>3</sub> CHO concentration of $2.46 \times 10^9$<br>molecules cm <sup>-3</sup> and the temperature range of 200 - 298 K.                                     | S15 |
| Table S12. The calculated atmospheric lifetime of H <sub>2</sub> SO <sub>4</sub> at the (CH <sub>3</sub> ) <sub>2</sub> NH concentration<br>of $3.2 \times 10^9$ molecules cm <sup>-3</sup> , the CH <sub>3</sub> CHO concentration of $1.12 \times 10^{12}$<br>molecules cm <sup>-3</sup> and the temperature range of 200 - 298 K.                                  | S16 |
| Figure S1. Gibbs free energy reaction profile of CH <sub>3</sub> CHO + H <sub>2</sub> SO <sub>4</sub> + (CH <sub>3</sub> ) <sub>2</sub> NH reaction<br>at 298 K.                                                                                                                                                                                                      | S17 |
| Figure S2. Relative energies with zero point correction for the CH <sub>3</sub> CHO + H <sub>2</sub> SO <sub>4</sub> reaction.                                                                                                                                                                                                                                        | S18 |
| Figure S3. Relative energies with zero point correction for CH <sub>3</sub> CHO + H <sub>2</sub> SO <sub>4</sub> +<br>(CH <sub>3</sub> ) <sub>2</sub> NH reaction.                                                                                                                                                                                                    | S19 |
| Figure S4. Selected geometrical parameters.                                                                                                                                                                                                                                                                                                                           | S20 |
| Figure S5. Intrinsic reaction coordinate results of TS1A.                                                                                                                                                                                                                                                                                                             | S21 |
| Figure S6. Intrinsic reaction coordinate results of TS1B.                                                                                                                                                                                                                                                                                                             | S22 |
| Figure S7. Intrinsic reaction coordinate results of TS1C.                                                                                                                                                                                                                                                                                                             | S23 |
| Figure S8. Intrinsic reaction coordinate results of TS1D.                                                                                                                                                                                                                                                                                                             | S24 |
| Figure S9. Intrinsic reaction coordinate results of TS1E.                                                                                                                                                                                                                                                                                                             | S25 |
| Figure S10. Intrinsic reaction coordinate results of TS1F.                                                                                                                                                                                                                                                                                                            | S26 |
| Table S13. Molecular coordinate and frequency information.                                                                                                                                                                                                                                                                                                            | S27 |

### Calculated details for kinetics

For the  $\text{CH}_3\text{CHO} + \text{H}_2\text{SO}_4 + (\text{CH}_3)_2\text{NH} \rightarrow \text{CH}_3\text{HC}(\text{OH})\text{OSO}_3\text{H} + (\text{CH}_3)_2\text{NH}$  reaction, we only consider the reaction mechanism can be written in detail as the following expression.

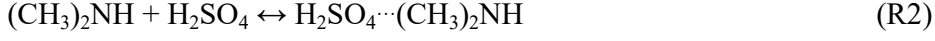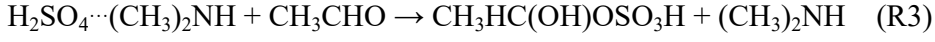

As the result, the total rate constant  $k = K_{eq1}k_1$ ,

$$K_{eq1} = \sigma \frac{Q_{\text{H}_2\text{SO}_4 \cdots (\text{CH}_3)_2\text{NH}}}{Q_{\text{H}_2\text{SO}_4} Q_{(\text{CH}_3)_2\text{NH}}} \exp\left(-\frac{E_{\text{H}_2\text{SO}_4 \cdots (\text{CH}_3)_2\text{NH}} - E_{\text{H}_2\text{SO}_4} - E_{(\text{CH}_3)_2\text{NH}}}{RT}\right) \quad (5)$$

where  $K_{eq1}$  is the equilibrium constant of  $\text{H}_2\text{SO}_4 \cdots (\text{CH}_3)_2\text{NH}$  with respect to  $\text{H}_2\text{SO}_4$  and  $(\text{CH}_3)_2\text{NH}$ , which is computed by using equation (5).  $k_1$  is the bimolecular rate constant of the  $\text{H}_2\text{SO}_4 \cdots (\text{CH}_3)_2\text{NH} + \text{CH}_3\text{CHO}$  reaction.

With regard to R3, we consider the following reaction mechanism in reactions (R4) and (R5).

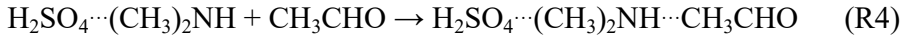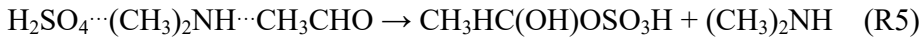

The bimolecular rate constant ( $k_1$ ) of the reaction R3 is equal to  $K_{eq2}k_u$ , where  $K_{eq2}$  is the equilibrium constant of  $\text{H}_2\text{SO}_4 \cdots (\text{CH}_3)_2\text{NH} \cdots \text{CH}_3\text{CHO}$  with respect to  $\text{H}_2\text{SO}_4 \cdots (\text{CH}_3)_2\text{NH}$  and  $\text{CH}_3\text{CHO}$  and  $k_u$  is the unimolecular reaction rate constant of the reaction R5.  $K_{eq2}$  and  $k_u$  are calculated by using the formulas in equations (6) and (7.)

$$K_{eq2} = \sigma \frac{Q_{\text{H}_2\text{SO}_4 \cdots (\text{CH}_3)_2\text{NH} \cdots \text{CH}_3\text{CHO}}}{Q_{\text{H}_2\text{SO}_4 \cdots (\text{CH}_3)_2\text{NH}} Q_{\text{CH}_3\text{CHO}}} \exp\left(-\frac{E_{\text{H}_2\text{SO}_4 \cdots (\text{CH}_3)_2\text{NH} \cdots \text{CH}_3\text{CHO}} - E_{\text{H}_2\text{SO}_4 \cdots (\text{CH}_3)_2\text{NH}} - E_{\text{CH}_3\text{CHO}}}{RT}\right) \quad (6)$$

$$k_u = \kappa \frac{k_B T Q_{TS}}{h Q_{H_2SO_4 \cdots (CH_3)_2NH \cdots CH_3CHO}} \exp\left(-\frac{E_{TS} - E_{H_2SO_4 \cdots (CH_3)_2NH \cdots CH_3CHO}}{RT}\right) \quad (7)$$

In the equations (5)-(7),  $\sigma$  is the reaction symmetry number,  $\kappa$  is the tunneling coefficient obtained by Eckart correction,  $Q_{H_2SO_4 \cdots (CH_3)_2NH \cdots CH_3CHO}$ ,  $Q_{H_2SO_4 \cdots (CH_3)_2NH}$ ,  $Q_{H_2SO_4}$ ,  $Q_{CH_3CHO}$ ,  $Q_{(CH_3)_2NH}$ , and  $Q_{TS}$  are the partition functions of  $H_2SO_4 \cdots (CH_3)_2NH \cdots CH_3CHO$ ,  $H_2SO_4 \cdots (CH_3)_2NH$ ,  $H_2SO_4$ ,  $CH_3CHO$ ,  $(CH_3)_2NH$ , and the transition states. The  $E_{H_2SO_4 \cdots (CH_3)_2NH \cdots CH_3CHO}$ ,  $E_{H_2SO_4 \cdots (CH_3)_2NH}$ ,  $E_{CH_3CHO}$ ,  $E_{H_2SO_4}$ ,  $E_{(CH_3)_2NH}$ , and  $E_{TS}$  are the total energies with zero-point vibrational energies of  $H_2SO_4 \cdots (CH_3)_2NH \cdots CH_3CHO$ ,  $H_2SO_4 \cdots (CH_3)_2NH$ ,  $CH_3CHO$ ,  $H_2SO_4$ ,  $(CH_3)_2NH$ , and the transition states calculated by CCSD(T)-F12a/jun-cc-pV(T+d)Z//M06-2X/MG3S.  $k_B$  and  $h$  are the Boltzmann and Planck constants, respectively.

Thus, the total rate of the  $CH_3CHO + H_2SO_4 + (CH_3)_2NH$  reaction can be written as the eq7.

$$v_1 = \frac{d[CH_3HC(OH)OSO_3H]}{dt} = K_{eq1} k_1 [CH_3CHO][H_2SO_4][(CH_3)_2NH] \quad (7)$$

Besides, the following rate ratios can be expressed as equations (8)-(10).

$$\frac{v_1}{v_2} = \frac{K_{eq1} k_1 [CH_3CHO][H_2SO_4][(CH_3)_2NH]}{k_2 [CH_3CHO][H_2SO_4]} = \frac{K_{eq1} k_1 [(CH_3)_2NH]}{k_2} \quad (8)$$

(8)

$$\frac{v_1}{v_{CH_3CHO + OH}} = \frac{K_{eq1} k_1 [CH_3CHO][H_2SO_4][(CH_3)_2NH]}{k_{CH_3CHO + OH} [CH_3CHO][OH]} = \frac{K_{eq1} k_1 [H_2SO_4][(CH_3)_2NH]}{k_{CH_3CHO + OH} [OH]} \quad (9)$$

$$\frac{v_1}{v_{H_2SO_4 + OH}} = \frac{K_{eq1} k_1 [CH_3CHO][H_2SO_4][(CH_3)_2NH]}{k_{H_2SO_4 + OH} [H_2SO_4][OH]} = \frac{K_{eq1} k_1 [CH_3CHO][(CH_3)_2NH]}{k_{H_2SO_4 + OH} [OH]} \quad (10)$$

Table S1. T1 diagnostic values for all the species at the CCSD(T)-F12a/jun-cc-pV(T+d)Z //M06-2X/MG3S level.

|                |                     |                                |                                    |       |       |       |
|----------------|---------------------|--------------------------------|------------------------------------|-------|-------|-------|
| species        | CH <sub>3</sub> CHO | H <sub>2</sub> SO <sub>4</sub> | (CH <sub>3</sub> ) <sub>2</sub> NH | C1A   | TS1A  | C1B   |
| T <sub>1</sub> | 0.014               | 0.015                          | 0.009                              | 0.014 | 0.014 | 0.014 |
| species        | TS1B                | C1C                            | TS1C                               | C1D   | TS1D  | C1E   |
| T <sub>1</sub> | 0.014               | 0.014                          | 0.014                              | 0.014 | 0.014 | 0.014 |
| species        | TS1E                | C1F                            | TS1F                               | CP1   | P1    |       |
| T <sub>1</sub> | 0.014               | 0.014                          | 0.014                              | 0.013 | 0.014 |       |

Table S2. The calculated binding energies of the  $\text{H}_2\text{SO}_4 \cdots (\text{CH}_3)_2\text{NH}$ ,  $\text{H}_2\text{SO}_4 \cdots \text{CH}_3\text{CHO}$  and  $\text{CH}_3\text{CHO} \cdots (\text{CH}_3)_2\text{NH}$  complexes at the CCSD(T)-F12a/jun-cc-pV(T+d)Z//M06-2X/MG3S level. (kcal /mol)

| Method                                        | $\Delta E$                                                       |                                                      |                                                         |
|-----------------------------------------------|------------------------------------------------------------------|------------------------------------------------------|---------------------------------------------------------|
|                                               | $\text{H}_2\text{SO}_4 \cdots (\text{CH}_3)_2\text{NH}$<br>(M1A) | $\text{H}_2\text{SO}_4 \cdots \text{CH}_3\text{CHO}$ | $\text{CH}_3\text{CHO} \cdots (\text{CH}_3)_2\text{NH}$ |
| CCSD(T)-F12a/jun-cc-pV(T+d)Z<br>//M06-2X/MG3S | -22.18                                                           | -11.91                                               | -3.43                                                   |

Table S3. The calculated equilibrium constants ( $K_{eq}$ ,  $\text{cm}^3 \text{ molecules}^{-1}$ ) and the concentrations of the dimer complexes when the  $[(\text{CH}_3)_2\text{NH}] = 3.2 \times 10^9$ ,  $[\text{H}_2\text{SO}_4] = 4 \times 10^8$ ,  $[\text{CH}_3\text{CHO}] = 1.12 \times 10^{12} \text{ molecule cm}^{-3}$  for the  $\text{H}_2\text{SO}_4 + (\text{CH}_3)_2\text{NH} + \text{CH}_3\text{CHO}$  in the temperature range of 200 - 298 K.

| T(K) | $K_{eq1}^a$            | $K_{eq2}^b$            | $K_{eq3}^c$            | $[\text{H}_2\text{SO}_4 \cdots (\text{CH}_3)_2\text{NH}]^d$ | $[\text{H}_2\text{SO}_4 \cdots \text{CH}_3\text{CHO}]^e$ | $[\text{CH}_3\text{CHO} \cdots (\text{CH}_3)_2\text{NH}]^f$ |
|------|------------------------|------------------------|------------------------|-------------------------------------------------------------|----------------------------------------------------------|-------------------------------------------------------------|
| 200  | $2.33 \times 10^{-3}$  | $1.64 \times 10^{-14}$ | $5.83 \times 10^{-23}$ | $2.98 \times 10^{15}$                                       | $7.34 \times 10^6$                                       | $2.09 \times 10^{-1}$                                       |
| 220  | $1.56 \times 10^{-5}$  | $1.14 \times 10^{-15}$ | $3.06 \times 10^{-23}$ | $1.99 \times 10^{13}$                                       | $5.12 \times 10^5$                                       | $1.10 \times 10^{-1}$                                       |
| 240  | $2.43 \times 10^{-7}$  | $1.26 \times 10^{-16}$ | $1.82 \times 10^{-23}$ | $3.11 \times 10^{11}$                                       | $5.65 \times 10^4$                                       | $6.53 \times 10^{-2}$                                       |
| 260  | $7.27 \times 10^{-9}$  | $1.98 \times 10^{-17}$ | $1.20 \times 10^{-23}$ | $9.31 \times 10^9$                                          | $8.85 \times 10^3$                                       | $4.29 \times 10^{-2}$                                       |
| 280  | $3.63 \times 10^{-10}$ | $4.08 \times 10^{-18}$ | $8.47 \times 10^{-24}$ | $4.64 \times 10^8$                                          | $1.83 \times 10^3$                                       | $3.04 \times 10^{-2}$                                       |
| 298  | $3.47 \times 10^{-11}$ | $1.19 \times 10^{-18}$ | $6.54 \times 10^{-24}$ | $4.44 \times 10^7$                                          | $5.34 \times 10^2$                                       | $2.34 \times 10^{-2}$                                       |
| 320  | $2.84 \times 10^{-12}$ | $3.23 \times 10^{-19}$ | $5.02 \times 10^{-24}$ | $3.63 \times 10^6$                                          | $1.44 \times 10^2$                                       | $1.80 \times 10^{-2}$                                       |
| 340  | $3.88 \times 10^{-13}$ | $1.15 \times 10^{-19}$ | $4.11 \times 10^{-24}$ | $4.97 \times 10^5$                                          | $5.14 \times 10^1$                                       | $1.47 \times 10^{-2}$                                       |

<sup>a</sup>The equilibrium constants of the  $\text{H}_2\text{SO}_4 \cdots (\text{CH}_3)_2\text{NH}$  complex with respect to  $\text{H}_2\text{SO}_4$  and  $(\text{CH}_3)_2\text{NH}$ .

<sup>b</sup>The equilibrium constants of the  $\text{H}_2\text{SO}_4 \cdots \text{CH}_3\text{CHO}$  complex with respect to  $\text{H}_2\text{SO}_4$  and  $\text{CH}_3\text{CHO}$ .

<sup>c</sup>The equilibrium constants of the  $\text{CH}_3\text{CHO} \cdots (\text{CH}_3)_2\text{NH}$  complex with respect to  $\text{CH}_3\text{CHO}$

and  $(\text{CH}_3)_2\text{NH}$ .

$$^d[\text{H}_2\text{SO}_4 \cdots (\text{CH}_3)_2\text{NH}] = K_{\text{eq}1}[\text{H}_2\text{SO}_4][(\text{CH}_3)_2\text{NH}].$$

$$^e[\text{H}_2\text{SO}_4 \cdots \text{CH}_3\text{CHO}] = K_{\text{eq}2}[\text{H}_2\text{SO}_4][\text{CH}_3\text{CHO}].$$

$$^f[\text{CH}_3\text{CHO} \cdots (\text{CH}_3)_2\text{NH}] = K_{\text{eq}3}[\text{CH}_3\text{CHO}][(\text{CH}_3)_2\text{NH}].$$

Table S4. The calculated bimolecular rate constants  $k_2$   $\text{cm}^3$   $\text{molecules}^{-1}$   $\text{s}^{-1}$  for the individual reaction pathways over the temperature range 200 - 298 K.

|         | 200 K                  | 220 K                  | 240 K                  | 260 K                  | 280 K                  | 298 K                  |
|---------|------------------------|------------------------|------------------------|------------------------|------------------------|------------------------|
| $k_2^a$ | $3.88 \times 10^{-16}$ | $4.23 \times 10^{-16}$ | $4.61 \times 10^{-16}$ | $4.99 \times 10^{-16}$ | $5.39 \times 10^{-16}$ | $5.77 \times 10^{-16}$ |

$^a k_2$  is the he bimolecular rate constants of the  $\text{H}_2\text{SO}_4 + \text{CH}_3\text{CHO}$  reaction.



Table S5. The rate ratio of each reaction path when the  $[(CH_3)_2NH] = 3.2 \times 10^9$ ,  $[H_2SO_4] = 4 \times 10^8$ ,  $[CH_3CHO] = 1.12 \times 10^{12}$  molecule  $cm^{-3}$  of each reaction channel in the temperature range of 200 - 298 K.<sup>a</sup>

| Reaction  | 200 K              | 220 K              | 240 K              | 260 K              | 280 K                 | 298 K                 |
|-----------|--------------------|--------------------|--------------------|--------------------|-----------------------|-----------------------|
| $v_1/v_2$ | $2.98 \times 10^6$ | $2.00 \times 10^4$ | $3.21 \times 10^2$ | $9.95 \times 10^0$ | $5.17 \times 10^{-1}$ | $5.15 \times 10^{-2}$ |

$$\frac{v_1}{v_2} = \frac{K_{eq1}k_1[CH_3CHO][H_2SO_4][(CH_3)_2NH]}{k_2[CH_3CHO][H_2SO_4]} = \frac{K_{eq1}k_1[(CH_3)_2NH]}{k_2}$$

Table S6. The rate ratio of the  $v_1/v_{CH_3CHO + OH}$  in the temperature range of 200 - 298 K ( $[(CH_3)_2NH] = 3.2 \times 10^9$ ,  $[H_2SO_4] = 1.0 \times 10^6$  molecule  $cm^{-3}$ ).

| Reaction                                                                          | 200 K              | 220 K                 | 240 K                 | 260 K                 | 280 K                 | 298 K                 |
|-----------------------------------------------------------------------------------|--------------------|-----------------------|-----------------------|-----------------------|-----------------------|-----------------------|
| $CH_3CHO + H_2SO_4 + (CH_3)_2NH \rightarrow CH_3HC(OH)OSO_3H + (CH_3)_2NH$        |                    |                       |                       |                       |                       |                       |
| $CH_3CHO + OH \rightarrow CH_3CO + H_2O$ [OH]= $1 \times 10^6$ molecule $cm^{-3}$ |                    |                       |                       |                       |                       |                       |
| $v_1/v_{CH_3CHO + OH}$                                                            | $4.23 \times 10^1$ | $3.67 \times 10^{-1}$ | $7.34 \times 10^{-3}$ | $2.77 \times 10^{-4}$ | $1.72 \times 10^{-5}$ | $1.98 \times 10^{-6}$ |
| $CH_3CHO + OH \rightarrow CH_3CO + H_2O$ [OH]= $1 \times 10^5$ molecule $cm^{-3}$ |                    |                       |                       |                       |                       |                       |
| $v_1/v_{CH_3CHO + OH}$                                                            | $4.23 \times 10^2$ | $3.67 \times 10^0$    | $7.34 \times 10^{-2}$ | $2.77 \times 10^{-3}$ | $1.72 \times 10^{-4}$ | $1.98 \times 10^{-5}$ |
| $CH_3CHO + OH \rightarrow CH_3CO + H_2O$ [OH]= $1 \times 10^4$ molecule $cm^{-3}$ |                    |                       |                       |                       |                       |                       |
| $v_1/v_{CH_3CHO + OH}$                                                            | $4.23 \times 10^3$ | $3.67 \times 10^1$    | $7.34 \times 10^{-1}$ | $2.77 \times 10^{-2}$ | $1.72 \times 10^{-3}$ | $1.98 \times 10^{-4}$ |
| $CH_3CHO + OH \rightarrow CH_3CO + H_2O$ [OH]= $1 \times 10^3$ molecule $cm^{-3}$ |                    |                       |                       |                       |                       |                       |

|                        |                    |                    |                    |                       |                       |                       |
|------------------------|--------------------|--------------------|--------------------|-----------------------|-----------------------|-----------------------|
| $v_1/v_{CH_3CHO + OH}$ | $4.23 \times 10^4$ | $3.67 \times 10^2$ | $7.34 \times 10^0$ | $2.77 \times 10^{-1}$ | $1.72 \times 10^{-2}$ | $1.98 \times 10^{-3}$ |
|------------------------|--------------------|--------------------|--------------------|-----------------------|-----------------------|-----------------------|

Table S7. The rate ratio of the  $v_1/v_{CH_3CHO + OH}$  in the temperature range of 200 - 298 K ( $[(CH_3)_2NH] = 3.2 \times 10^9$ ,  $[H_2SO_4] = 1.0 \times 10^7$  molecule  $cm^{-3}$ ).

| Reaction                                                                          | 200 K              | 220 K              | 240 K                 | 260 K                 | 280 K                 | 298 K                 |
|-----------------------------------------------------------------------------------|--------------------|--------------------|-----------------------|-----------------------|-----------------------|-----------------------|
| $CH_3CHO + H_2SO_4 + (CH_3)_2NH \rightarrow CH_3HC(OH)OSO_3H + (CH_3)_2NH$        |                    |                    |                       |                       |                       |                       |
| $CH_3CHO + OH \rightarrow CH_3CO + H_2O$ [OH]= $1 \times 10^6$ molecule $cm^{-3}$ |                    |                    |                       |                       |                       |                       |
| $v_1/v_{CH_3CHO + OH}$                                                            | $4.23 \times 10^2$ | $3.67 \times 10^0$ | $7.34 \times 10^{-2}$ | $2.77 \times 10^{-3}$ | $1.72 \times 10^{-4}$ | $1.98 \times 10^{-5}$ |
| $CH_3CHO + OH \rightarrow CH_3CO + H_2O$ [OH]= $1 \times 10^5$ molecule $cm^{-3}$ |                    |                    |                       |                       |                       |                       |
| $v_1/v_{CH_3CHO + OH}$                                                            | $4.23 \times 10^3$ | $3.67 \times 10^1$ | $7.34 \times 10^{-1}$ | $2.77 \times 10^{-2}$ | $1.72 \times 10^{-3}$ | $1.98 \times 10^{-4}$ |
| $CH_3CHO + OH \rightarrow CH_3CO + H_2O$ [OH]= $1 \times 10^4$ molecule $cm^{-3}$ |                    |                    |                       |                       |                       |                       |
| $v_1/v_{CH_3CHO + OH}$                                                            | $4.23 \times 10^4$ | $3.67 \times 10^2$ | $7.34 \times 10^0$    | $2.77 \times 10^{-1}$ | $1.72 \times 10^{-2}$ | $1.98 \times 10^{-3}$ |
| $CH_3CHO + OH \rightarrow CH_3CO + H_2O$ [OH]= $1 \times 10^3$ molecule $cm^{-3}$ |                    |                    |                       |                       |                       |                       |

|                        |                    |                    |                    |                    |                       |                       |
|------------------------|--------------------|--------------------|--------------------|--------------------|-----------------------|-----------------------|
| $v_1/v_{CH_3CHO + OH}$ | $4.23 \times 10^5$ | $3.67 \times 10^3$ | $7.34 \times 10^1$ | $2.77 \times 10^0$ | $1.72 \times 10^{-1}$ | $1.98 \times 10^{-2}$ |
|------------------------|--------------------|--------------------|--------------------|--------------------|-----------------------|-----------------------|

Table S8. The rate ratio of the  $v_1/v_{CH_3CHO + OH}$  in the temperature range of 200 - 298 K ( $[(CH_3)_2NH] = 3.2 \times 10^9$ ,  $[H_2SO_4] = 4.0 \times 10^8$  molecule  $cm^{-3}$ ).

| Reaction                                                                          | 200 K              | 220 K              | 240 K              | 260 K                 | 280 K                 | 298 K                 |
|-----------------------------------------------------------------------------------|--------------------|--------------------|--------------------|-----------------------|-----------------------|-----------------------|
| $CH_3CHO + H_2SO_4 + (CH_3)_2NH \rightarrow CH_3HC(OH)OSO_3H + (CH_3)_2NH$        |                    |                    |                    |                       |                       |                       |
| $CH_3CHO + OH \rightarrow CH_3CO + H_2O$ [OH]= $1 \times 10^6$ molecule $cm^{-3}$ |                    |                    |                    |                       |                       |                       |
| $v_1/v_{CH_3CHO + OH}$                                                            | $1.69 \times 10^4$ | $1.47 \times 10^2$ | $2.94 \times 10^0$ | $1.11 \times 10^{-1}$ | $6.89 \times 10^{-3}$ | $7.93 \times 10^{-4}$ |
| $CH_3CHO + OH \rightarrow CH_3CO + H_2O$ [OH]= $1 \times 10^5$ molecule $cm^{-3}$ |                    |                    |                    |                       |                       |                       |
| $v_1/v_{CH_3CHO + OH}$                                                            | $1.69 \times 10^5$ | $1.47 \times 10^3$ | $2.94 \times 10^1$ | $1.11 \times 10^0$    | $6.89 \times 10^{-2}$ | $7.93 \times 10^{-3}$ |
| $CH_3CHO + OH \rightarrow CH_3CO + H_2O$ [OH]= $1 \times 10^4$ molecule $cm^{-3}$ |                    |                    |                    |                       |                       |                       |
| $v_1/v_{CH_3CHO + OH}$                                                            | $1.69 \times 10^6$ | $1.47 \times 10^4$ | $2.94 \times 10^2$ | $1.11 \times 10^1$    | $6.89 \times 10^{-1}$ | $7.93 \times 10^{-2}$ |
| $CH_3CHO + OH \rightarrow CH_3CO + H_2O$ [OH]= $1 \times 10^3$ molecule $cm^{-3}$ |                    |                    |                    |                       |                       |                       |

|                        |                    |                    |                    |                    |                    |                       |
|------------------------|--------------------|--------------------|--------------------|--------------------|--------------------|-----------------------|
| $v_1/v_{CH_3CHO + OH}$ | $1.69 \times 10^7$ | $1.47 \times 10^5$ | $2.94 \times 10^3$ | $1.11 \times 10^2$ | $6.89 \times 10^0$ | $7.93 \times 10^{-1}$ |
|------------------------|--------------------|--------------------|--------------------|--------------------|--------------------|-----------------------|

Table S9. The rate ratio of the  $v_1/v_{CH_3CHO + OH}$  in the temperature range of 200 - 298 K ( $[(CH_3)_2NH] = 3.2 \times 10^9$ ,  $[H_2SO_4] = 5.1 \times 10^9$  molecule  $cm^{-3}$ ).

| Reaction                                                                          | 200 K              | 220 K              | 240 K              | 260 K              | 280 K                 | 298 K                 |
|-----------------------------------------------------------------------------------|--------------------|--------------------|--------------------|--------------------|-----------------------|-----------------------|
| $CH_3CHO + H_2SO_4 + (CH_3)_2NH \rightarrow CH_3HC(OH)OSO_3H + (CH_3)_2NH$        |                    |                    |                    |                    |                       |                       |
| $CH_3CHO + OH \rightarrow CH_3CO + H_2O$ [OH]= $1 \times 10^6$ molecule $cm^{-3}$ |                    |                    |                    |                    |                       |                       |
| $v_1/v_{CH_3CHO + OH}$                                                            | $2.16 \times 10^5$ | $1.87 \times 10^3$ | $3.74 \times 10^1$ | $1.41 \times 10^0$ | $8.78 \times 10^{-2}$ | $1.01 \times 10^{-2}$ |
| $CH_3CHO + OH \rightarrow CH_3CO + H_2O$ [OH]= $1 \times 10^5$ molecule $cm^{-3}$ |                    |                    |                    |                    |                       |                       |
| $v_1/v_{CH_3CHO + OH}$                                                            | $2.16 \times 10^6$ | $1.87 \times 10^4$ | $3.74 \times 10^2$ | $1.41 \times 10^1$ | $8.78 \times 10^{-1}$ | $1.01 \times 10^{-1}$ |
| $CH_3CHO + OH \rightarrow CH_3CO + H_2O$ [OH]= $1 \times 10^4$ molecule $cm^{-3}$ |                    |                    |                    |                    |                       |                       |
| $v_1/v_{CH_3CHO + OH}$                                                            | $2.16 \times 10^7$ | $1.87 \times 10^5$ | $3.74 \times 10^3$ | $1.41 \times 10^2$ | $8.78 \times 10^0$    | $1.01 \times 10^0$    |
| $CH_3CHO + OH \rightarrow CH_3CO + H_2O$ [OH]= $1 \times 10^3$ molecule $cm^{-3}$ |                    |                    |                    |                    |                       |                       |

|                        |                    |                    |                    |                    |                    |                    |
|------------------------|--------------------|--------------------|--------------------|--------------------|--------------------|--------------------|
| $v_1/v_{CH_3CHO + OH}$ | $2.16 \times 10^8$ | $1.87 \times 10^6$ | $3.74 \times 10^4$ | $1.41 \times 10^3$ | $8.78 \times 10^1$ | $1.01 \times 10^1$ |
|------------------------|--------------------|--------------------|--------------------|--------------------|--------------------|--------------------|

Table S10. The rate ratio of the  $v_1/v_{H_2SO_4 + OH}$  in the temperature range of 200 - 298 K ( $[(CH_3)_2NH] = 3.2 \times 10^9$ ,  $[CH_3CHO] = 1.12 \times 10^{12}$  molecule  $cm^{-3}$ ).

| Reaction                                                                         | 200 K                 | 220 K                 | 240 K                 | 260 K              | 280 K              | 298 K              |
|----------------------------------------------------------------------------------|-----------------------|-----------------------|-----------------------|--------------------|--------------------|--------------------|
| $CH_3CHO + H_2SO_4 + (CH_3)_2NH \rightarrow CH_3HC(OH)OSO_3H + (CH_3)_2NH$       |                       |                       |                       |                    |                    |                    |
| $H_2SO_4 + OH \rightarrow HSO_4 + H_2O$ [OH]= $1 \times 10^6$ molecule $cm^{-3}$ |                       |                       |                       |                    |                    |                    |
| $v_1/v_{H_2SO_4 + OH}$                                                           | $1.10 \times 10^{12}$ | $8.07 \times 10^9$    | $1.41 \times 10^8$    | $4.73 \times 10^6$ | $2.66 \times 10^5$ | $2.83 \times 10^4$ |
| $H_2SO_4 + OH \rightarrow HSO_4 + H_2O$ [OH]= $1 \times 10^5$ molecule $cm^{-3}$ |                       |                       |                       |                    |                    |                    |
| $v_1/v_{H_2SO_4 + OH}$                                                           | $1.10 \times 10^{13}$ | $8.07 \times 10^{10}$ | $1.41 \times 10^9$    | $4.73 \times 10^7$ | $2.66 \times 10^6$ | $2.83 \times 10^5$ |
| $H_2SO_4 + OH \rightarrow HSO_4 + H_2O$ [OH]= $1 \times 10^4$ molecule $cm^{-3}$ |                       |                       |                       |                    |                    |                    |
| $v_1/v_{H_2SO_4 + OH}$                                                           | $1.10 \times 10^{14}$ | $8.07 \times 10^{11}$ | $1.41 \times 10^{10}$ | $4.73 \times 10^8$ | $2.66 \times 10^7$ | $2.83 \times 10^6$ |
| $H_2SO_4 + OH \rightarrow HSO_4 + H_2O$ [OH]= $1 \times 10^3$ molecule $cm^{-3}$ |                       |                       |                       |                    |                    |                    |

|                        |                       |                       |                       |                    |                    |                    |
|------------------------|-----------------------|-----------------------|-----------------------|--------------------|--------------------|--------------------|
| $v_1/v_{H_2SO_4 + OH}$ | $1.10 \times 10^{15}$ | $8.07 \times 10^{12}$ | $1.41 \times 10^{11}$ | $4.73 \times 10^9$ | $2.66 \times 10^8$ | $2.83 \times 10^7$ |
|------------------------|-----------------------|-----------------------|-----------------------|--------------------|--------------------|--------------------|

Table S11. The atmospheric lifetime of  $H_2SO_4$  calculated for the reaction of  $CH_3CHO$  and  $H_2SO_4$  catalyzed by  $(CH_3)_2NH$  at the  $(CH_3)_2NH$  concentration of  $3.2 \times 10^9$  molecules  $cm^{-3}$ , the  $CH_3CHO$  concentration of  $2.46 \times 10^9$  molecules  $cm^{-3}$  and the temperature range of 200 - 298 K.

| T(K) | $k_3$ ( $cm^6$ molecule $^{-2}$ s $^{-1}$ ) | $\tau^a$ (s)          |
|------|---------------------------------------------|-----------------------|
| 200  | $3.60 \times 10^{-19}$                      | $3.52 \times 10^{-1}$ |
| 220  | $2.65 \times 10^{-21}$                      | $4.79 \times 10^1$    |
| 240  | $4.62 \times 10^{-23}$                      | $2.75 \times 10^3$    |
| 260  | $1.55 \times 10^{-24}$                      | $8.18 \times 10^4$    |
| 280  | $8.72 \times 10^{-26}$                      | $1.46 \times 10^6$    |
| 298  | $9.27 \times 10^{-27}$                      | $1.37 \times 10^7$    |

$${}^a\tau = \frac{1}{k_3[CH_3CHO][(CH_3)_2NH]}, k_3 = K_{eq1}k_1.$$

Table S12. The atmospheric lifetime of H<sub>2</sub>SO<sub>4</sub> calculated for the reaction of CH<sub>3</sub>CHO and H<sub>2</sub>SO<sub>4</sub> catalyzed by (CH<sub>3</sub>)<sub>2</sub>NH at the (CH<sub>3</sub>)<sub>2</sub>NH concentration of 3.2 × 10<sup>9</sup> molecules cm<sup>-3</sup>, the CH<sub>3</sub>CHO concentration of 1.12 × 10<sup>12</sup> molecules cm<sup>-3</sup> and the temperature range of 200 - 298 K.

| T(K) | $k_3$ (cm <sup>6</sup> molecule <sup>-2</sup> s <sup>-1</sup> ) | $\tau^a$ (s)          |
|------|-----------------------------------------------------------------|-----------------------|
| 200  | $3.60 \times 10^{-19}$                                          | $7.74 \times 10^{-4}$ |
| 220  | $2.65 \times 10^{-21}$                                          | $1.05 \times 10^{-1}$ |
| 240  | $4.62 \times 10^{-23}$                                          | $6.04 \times 10^0$    |
| 260  | $1.55 \times 10^{-24}$                                          | $1.80 \times 10^2$    |
| 280  | $8.72 \times 10^{-26}$                                          | $3.20 \times 10^3$    |
| 298  | $9.27 \times 10^{-27}$                                          | $3.01 \times 10^4$    |

$${}^a\tau = \frac{1}{k_3[\text{CH}_3\text{CHO}][(\text{CH}_3)_2\text{NH}]}, k_3 = K_{\text{eq1}}k_1.$$





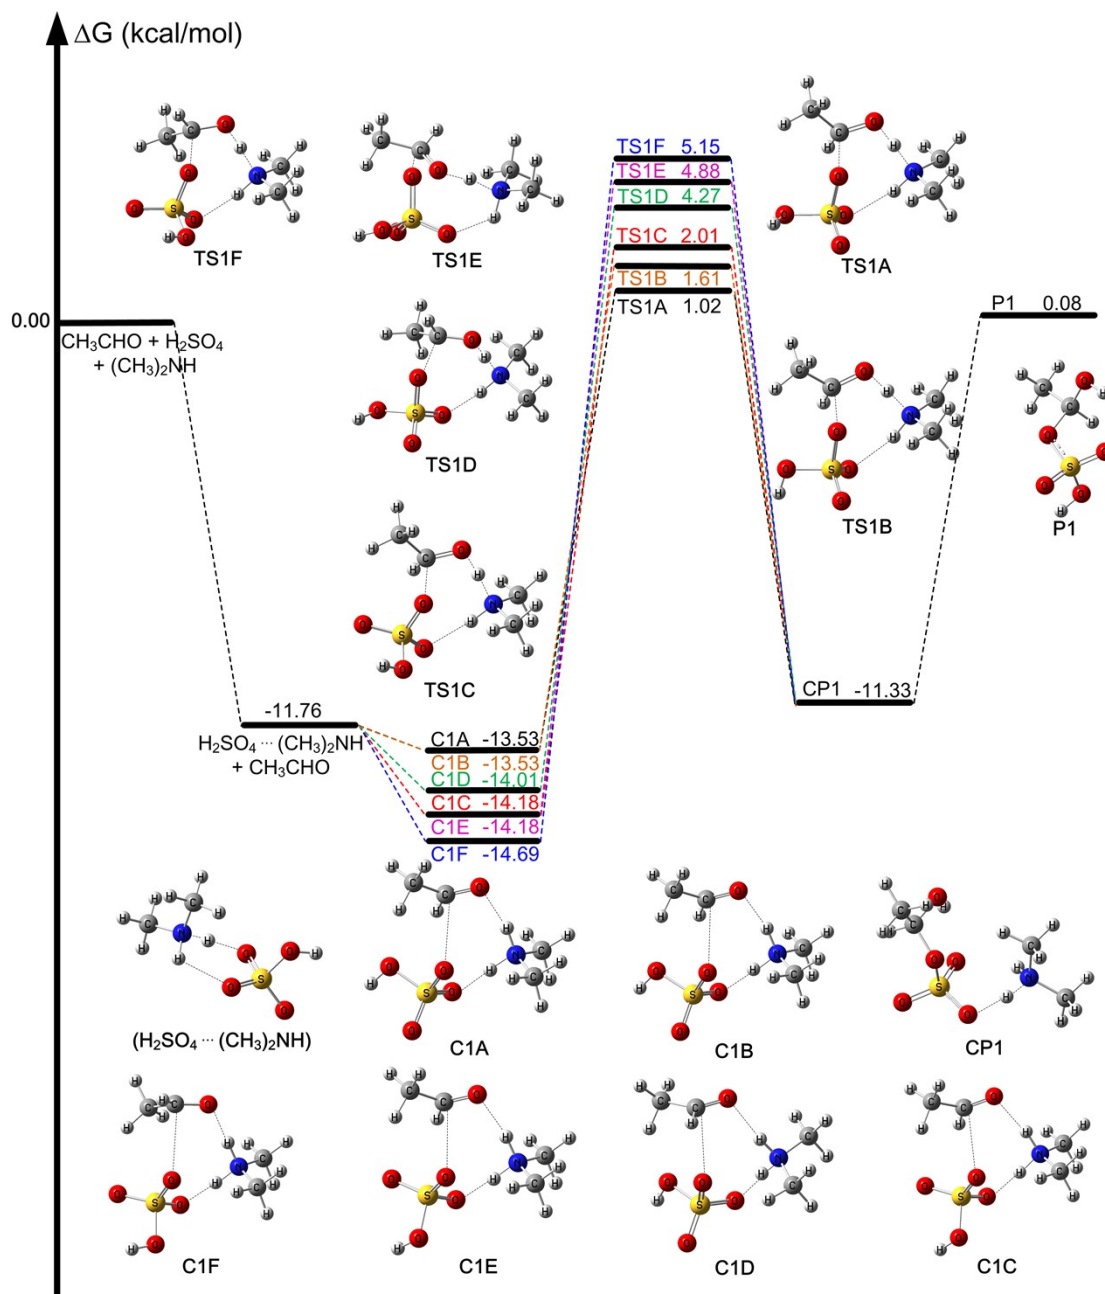

Figure S1. The free energy potential profile for the  $\text{CH}_3\text{CHO} + \text{H}_2\text{SO}_4 + (\text{CH}_3)_2\text{NH}$  reaction at 1 atmospheric pressure at the CCSD(T)-F12a/jun-cc-pV(T+d)Z//M06-2X/MG3S level (kcal/mol).

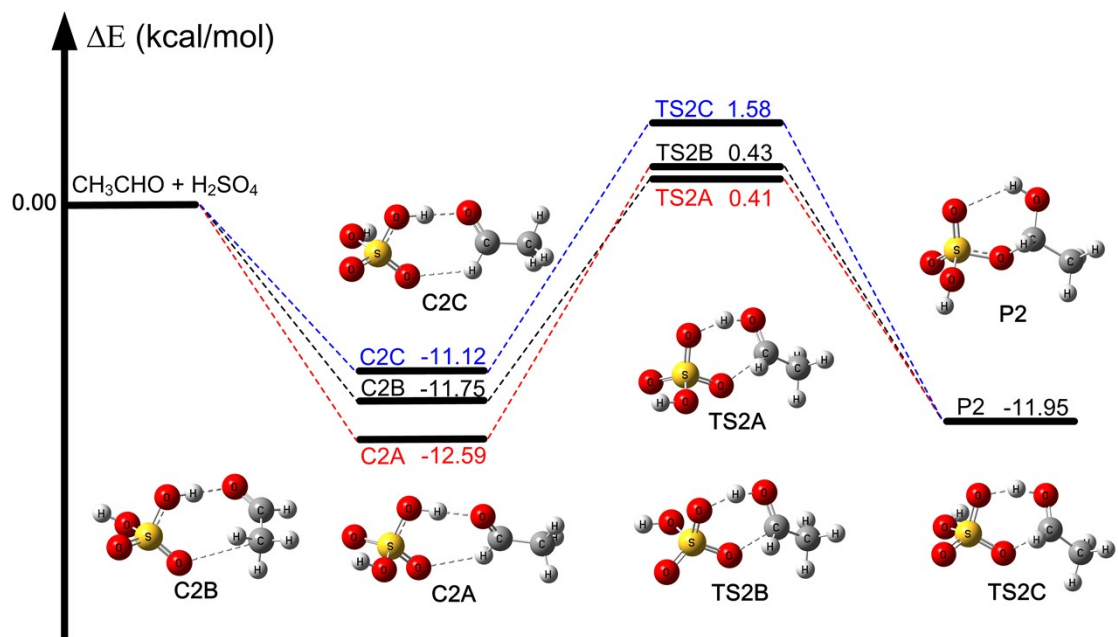

Figure S2. Calculated relative energies with zero-point vibrational correction for the  $\text{CH}_3\text{CHO} + \text{H}_2\text{SO}_4$  reaction at the CCSD(T)-F12a/cc-pVTZ-F12//M06-2X/MG3S level. (kcal /mol)

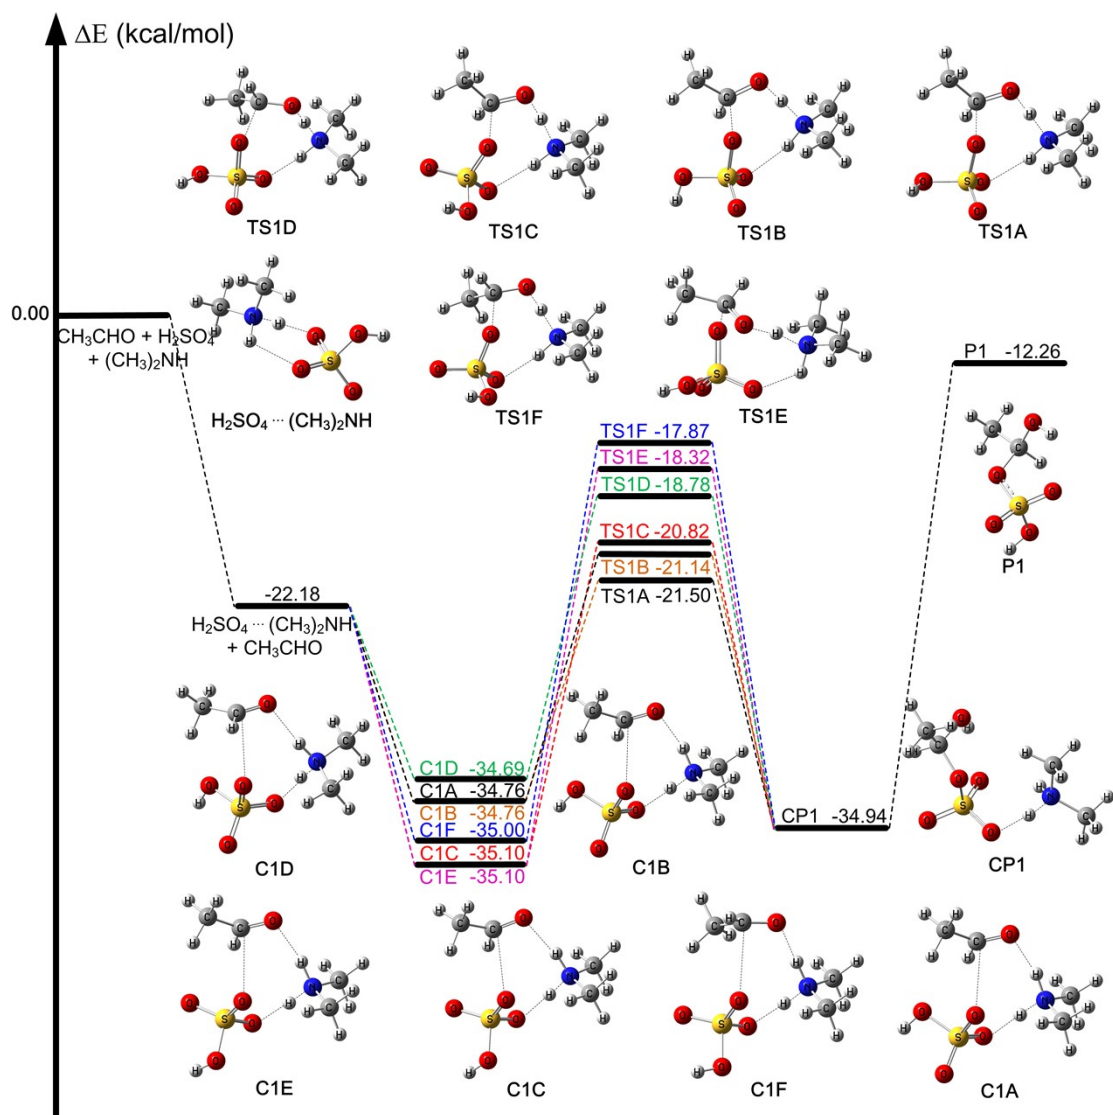

Figure S3. Calculated relative energies with zero-point vibrational correction for the  $\text{CH}_3\text{CHO} + \text{H}_2\text{SO}_4 + (\text{CH}_3)_2\text{NH}$  reaction at the CCSD(T)-F12a/jun-cc-pV(T+d)Z//M06-2X/MG3S level. (kcal/mol)

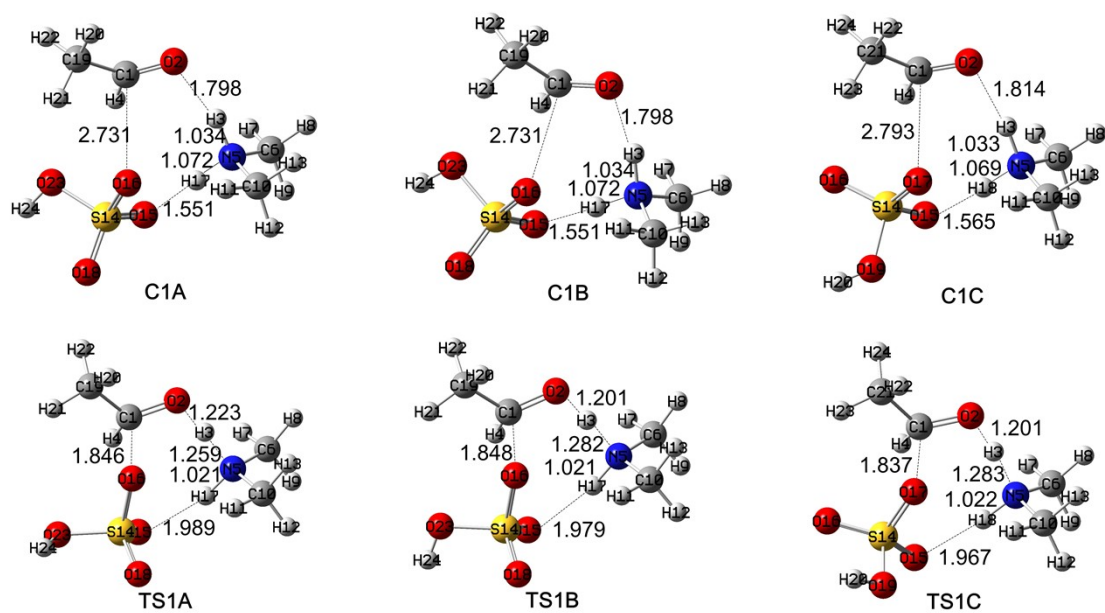

Figure S4. Selected geometrical parameters of the optimized transition states and complexes at the M06-2X/MG3S level of theory.

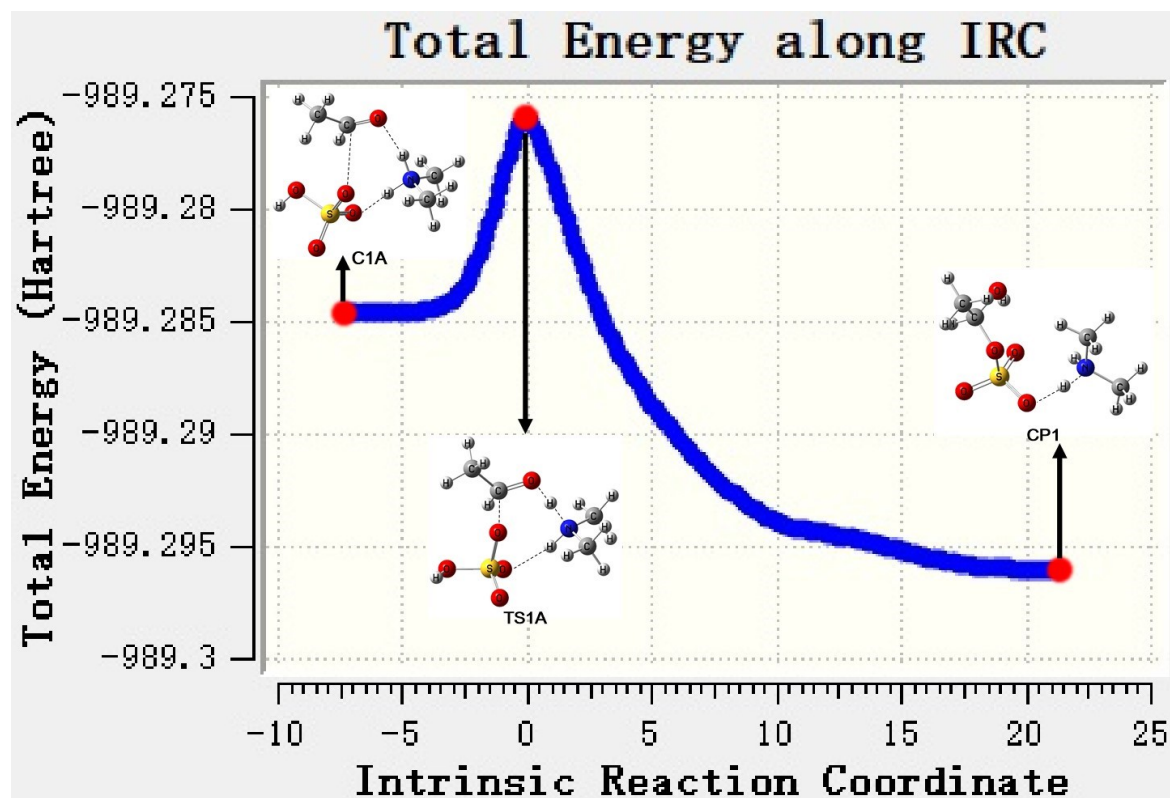

Figure S5. Intrinsic reaction coordinate results of TS1A.

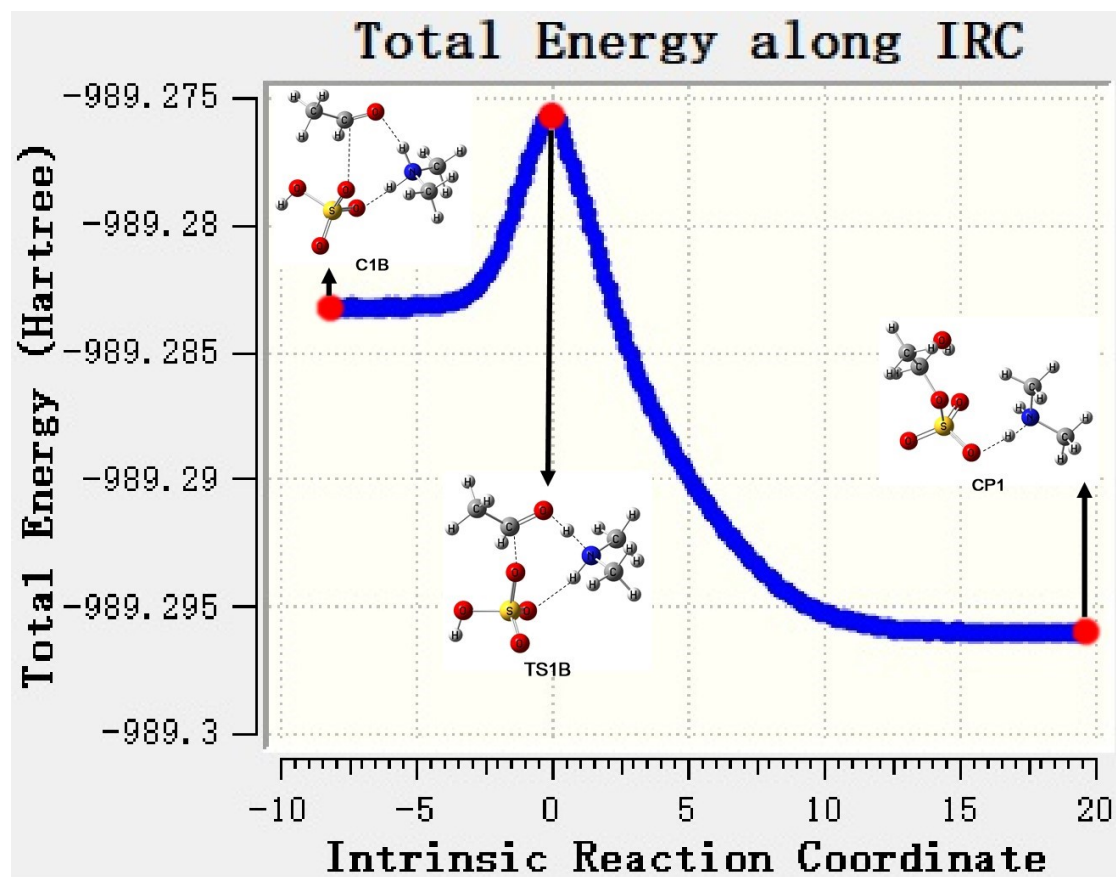

Figure S6. Intrinsic reaction coordinate results of TS1B.

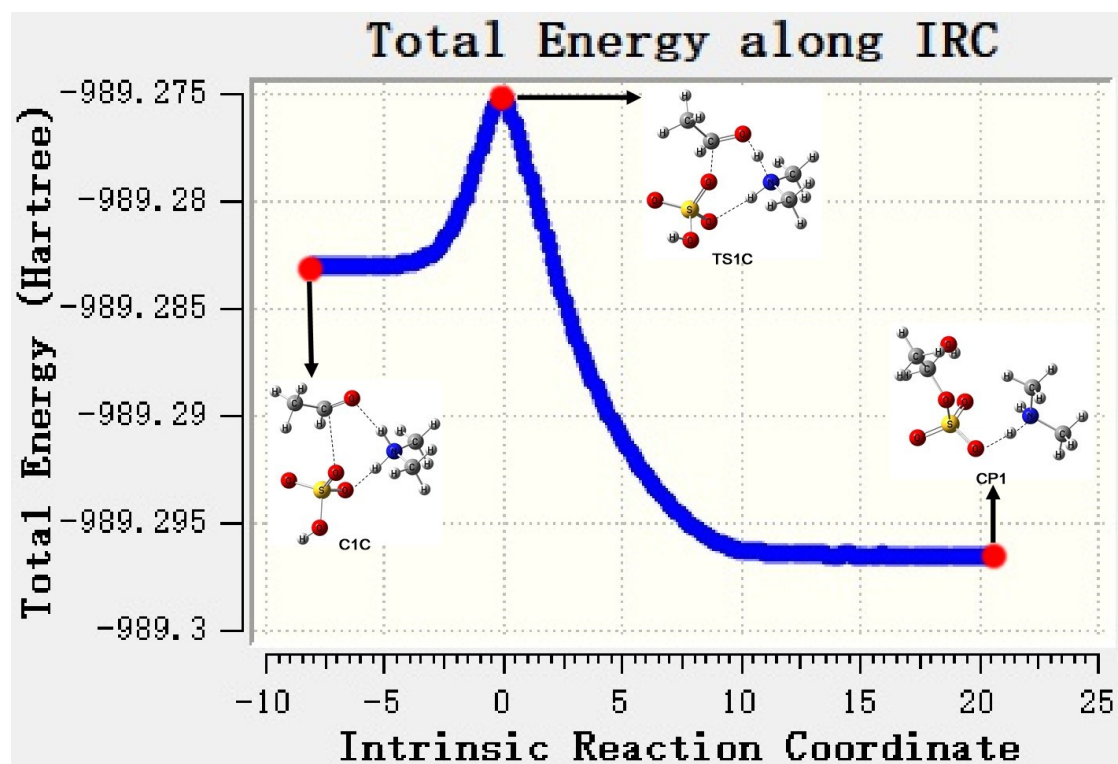

Figure S7. Intrinsic reaction coordinate result of TS1C.



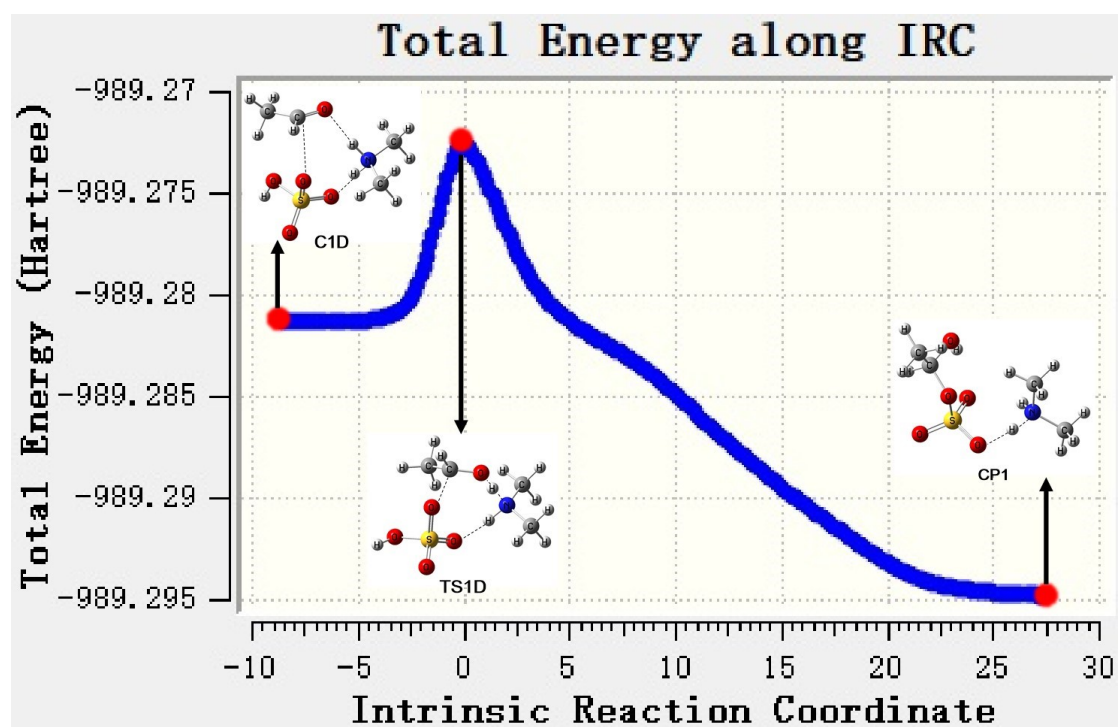

Figure S8. Intrinsic reaction coordinate result of TS1D.

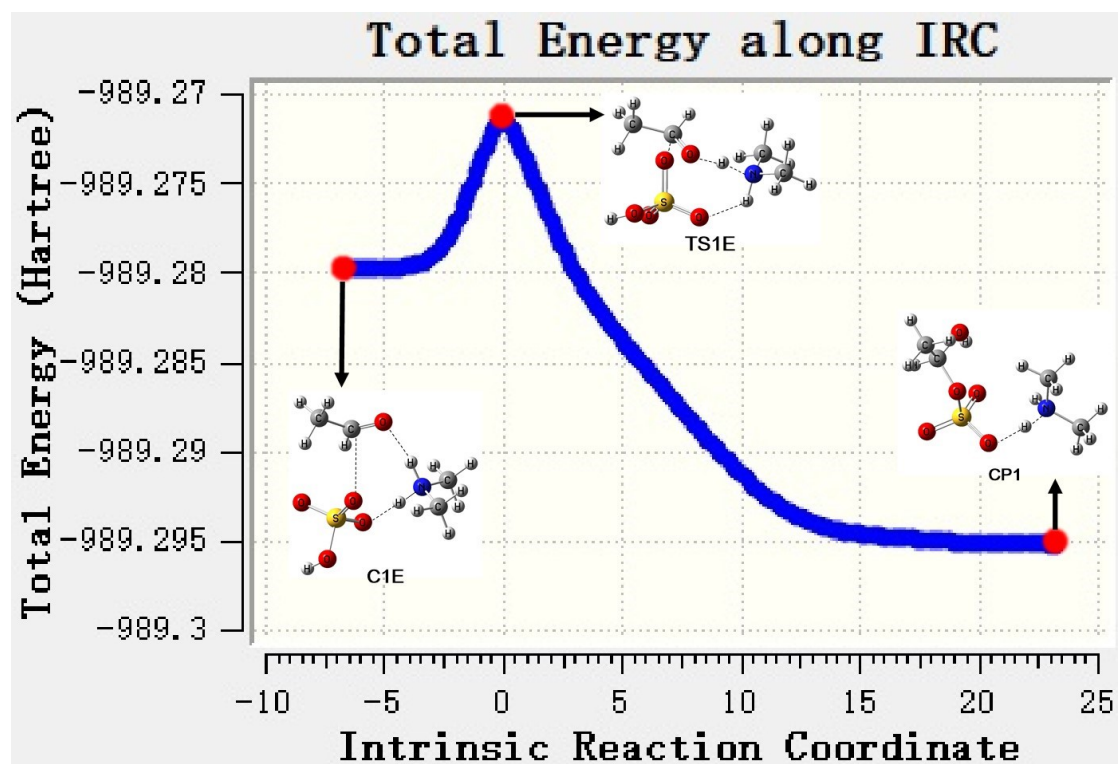

Figure S9. Intrinsic reaction coordinate result of TS1E.

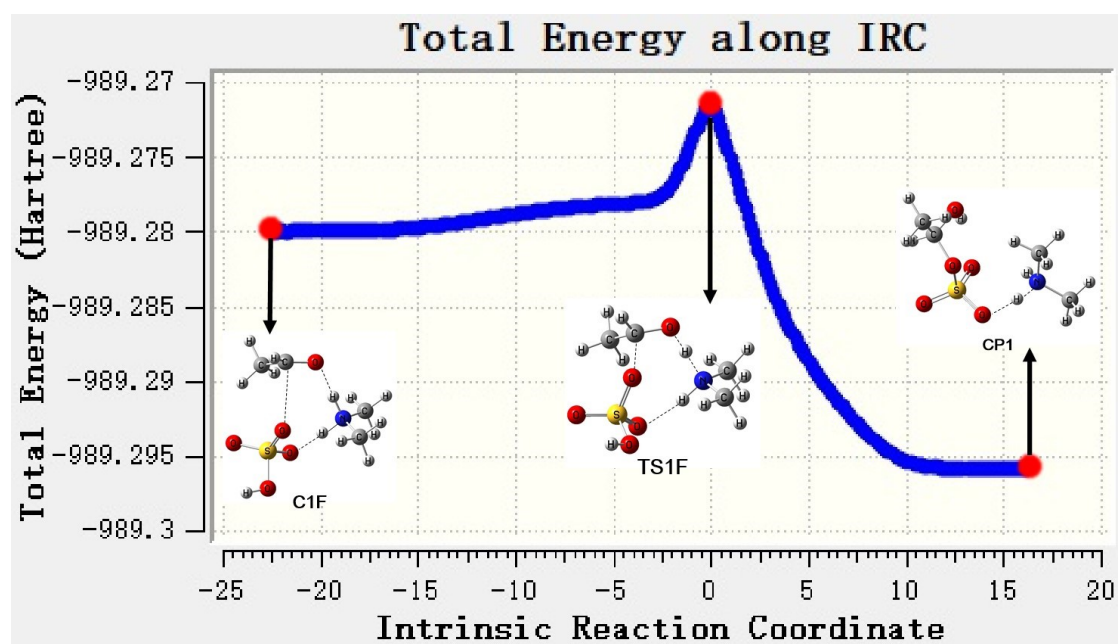

Figure S10. Intrinsic reaction coordinate result of TS1F.

Table S13. Molecular coordinates and frequency information.

| Species                            | Coordinate M06-2X/MG3S          | Frequencies cm <sup>-1</sup> |
|------------------------------------|---------------------------------|------------------------------|
| CH <sub>3</sub> CHO                | 0 1                             | 162.39 514.01                |
|                                    | C 1.162693 -0.147293 0.000002   | 776.21 900.22                |
|                                    | H 1.696008 0.223717 0.876878    | 1138.03 1144.93              |
|                                    | H 1.695975 0.223681 -0.876913   | 1383.51 1431.76              |
|                                    | H 1.148366 -1.233453 0.000016   | 1468.44 1476.87              |
|                                    | C -0.234181 0.398094 0.000004   | 1870.55 2942.70              |
|                                    | H -0.316141 1.502330 -0.000008  | 3064.20 3127.03              |
|                                    | O -1.224410 -0.277635 0.000000  | 3180.27                      |
|                                    | H <sub>2</sub> SO <sub>4</sub>  | 0 1                          |
| S 0.000000 0.000000 -0.154206      |                                 | 384.43 446.59                |
| O 0.640138 1.069468 -0.819825      |                                 | 509.63 560.23                |
| O -0.640138 -1.069465 -0.819830    |                                 | 571.28 876.01                |
| O -1.029703 0.662496 0.836377      |                                 | 923.29 1156.80               |
| H -1.692984 0.011484 1.101263      |                                 | 1177.34 1263.05              |
| O 1.029702 -0.662499 0.836375      |                                 | 1508.99 3831.24              |
| H 1.692986 -0.011490 1.101261      |                                 | 3835.90                      |
| (CH <sub>3</sub> ) <sub>2</sub> NH |                                 | 0 1                          |
|                                    | N 0.026533 0.585047 0.000000    | 390.73 770.54                |
|                                    | H -0.770809 1.206498 0.000000   | 963.20 1038.76               |
|                                    | C 0.026533 -0.223084 -1.205668  | 1108.10 1192.51              |
|                                    | H -0.028182 0.418519 -2.083382  | 1200.97 1271.47              |
|                                    | H 0.960967 -0.783611 -1.258995  | 1444.61 1473.18              |
|                                    | H -0.799442 -0.947316 -1.248017 | 1479.59 1494.19              |
|                                    | C 0.026533 -0.223084 1.205668   | 1505.27 1521.60              |
|                                    | H 0.960967 -0.783611 1.258995   | 1524.37 2983.19              |
|                                    | H -0.028182 0.418519 2.083382   | 2983.83 3086.51              |
|                                    | H -0.799442 -0.947316 1.248017  | 3088.44 3137.56              |
|                                    |                                 | 3137.73 3575.49              |
|                                    | ClA                             | 0 1                          |
| C 0.116118 2.212395 -0.307388      |                                 | 61.91 77.59                  |
| O 1.265532 2.258130 0.075369       |                                 | 99.47 101.96                 |
| H 1.900915 0.578377 -0.018875      |                                 | 114.98 123.15                |
| H -0.172770 1.504621 -1.101508     |                                 | 130.59 147.54                |
| N 2.023749 -0.447535 -0.059449     |                                 | 180.01 188.09                |
| C 3.095693 -0.799434 -1.007017     |                                 | 193.70 229.05                |
| H 2.857406 -0.383981 -1.981928     |                                 | 264.57 321.32                |
| H 4.043416 -0.398662 -0.655290     |                                 | 400.11 408.92                |
| H 3.158039 -1.882278 -1.079605     |                                 | 448.10 527.27                |
| C 2.237860 -0.969659 1.306791      |                                 | 583.75 592.52                |
| H 1.399551 -0.654573 1.920180      |                                 | 596.43 814.49                |
| H 2.274247 -2.055447 1.260397      |                                 | 825.96 916.51                |
| H 3.175680 -0.582854 1.698905      |                                 | 940.46 964.47                |
| S -1.304463 -0.909386 0.042232     |                                 | 1058.69 1073.48              |
| O -0.278527 -1.374911 -0.906206    |                                 | 1080.18 1148.96              |
| O -0.723448 -0.019985 1.023071     |                                 | 1153.76 1160.11              |
| H 1.090883 -0.829627 -0.424304     |                                 | 1162.45 1220.65              |
| O -2.169736 -1.944760 0.511327     |                                 | 1262.20 1293.27              |

|      |                                 |                 |
|------|---------------------------------|-----------------|
|      | C -0.980653 3.063430 0.224504   | 1379.20 1385.63 |
|      | H -0.609104 3.751331 0.978328   | 1444.77 1447.58 |
|      | H -1.730706 2.391705 0.646078   | 1463.52 1471.30 |
|      | H -1.454517 3.604360 -0.595957  | 1472.90 1477.34 |
|      | O -2.233587 0.086455 -0.824099  | 1495.55 1512.67 |
|      | H -2.923859 -0.439891 -1.243018 | 1517.50 1522.71 |
|      |                                 | 1590.55 1703.72 |
|      |                                 | 1816.12 2548.24 |
|      |                                 | 3010.18 3067.21 |
|      |                                 | 3088.56 3090.44 |
|      |                                 | 3133.62 3170.52 |
|      |                                 | 3173.65 3182.84 |
|      |                                 | 3183.79 3194.92 |
|      |                                 | 3211.02 3864.86 |
| TS1A | 0 1                             | -571.11 22.01   |
|      | C -0.034886 1.775263 -0.179658  | 52.10 64.69     |
|      | O 1.140293 1.766095 0.297385    | 77.36 111.32    |
|      | H 1.713967 0.725874 0.007072    | 122.27 147.72   |
|      | H -0.192632 1.322113 -1.162485  | 179.12 188.97   |
|      | N 2.201401 -0.418996 -0.185616  | 207.87 219.15   |
|      | C 3.546557 -0.361000 -0.763828  | 247.76 271.44   |
|      | H 3.507757 0.148305 -1.723485   | 326.23 399.00   |
|      | H 4.195526 0.199630 -0.093556   | 421.52 444.53   |
|      | H 3.958584 -1.361197 -0.901335  | 488.24 531.17   |
|      | C 2.150472 -1.122965 1.105636   | 578.97 598.63   |
|      | H 1.121078 -1.146022 1.455721   | 633.23 667.30   |
|      | H 2.528238 -2.140736 1.008624   | 858.90 923.38   |
|      | H 2.757907 -0.577487 1.825517   | 954.63 997.91   |
|      | S -1.342746 -0.799281 -0.036403 | 1023.22 1044.62 |
|      | O -0.416039 -1.102941 -1.093792 | 1052.96 1090.56 |
|      | O -0.928628 0.426502 0.709104   | 1154.83 1162.48 |
|      | H 1.539861 -0.869118 -0.819434  | 1164.87 1201.82 |
|      | O -1.706366 -1.843197 0.864898  | 1266.40 1273.69 |
|      | C -0.935454 2.910676 0.182272   | 1287.78 1384.76 |
|      | H -0.889745 3.082302 1.254734   | 1397.89 1406.35 |
|      | H -1.957638 2.709071 -0.125348  | 1451.22 1467.15 |
|      | H -0.572171 3.801256 -0.333077  | 1471.79 1486.06 |
|      | O -2.661788 -0.362047 -0.821250 | 1491.33 1497.89 |
|      | H -3.416505 -0.459664 -0.228474 | 1512.33 1516.44 |
|      |                                 | 1520.49 1575.52 |
|      |                                 | 1623.36 1744.26 |
|      |                                 | 3069.14 3071.64 |
|      |                                 | 3076.26 3080.29 |
|      |                                 | 3141.96 3147.34 |
|      |                                 | 3154.47 3166.29 |
|      |                                 | 3172.57 3186.53 |
|      |                                 | 3459.54 3854.79 |
| C1B  | 0 1                             | 31.17 44.96     |
|      | C 0.116042 2.212385 -0.307420   | 61.91 77.58     |
|      | O 1.265461 2.258125 0.075320    | 99.47 101.96    |
|      | H 1.900877 0.578398 -0.018952   | 114.98 123.15   |
|      | H -0.172850 1.504624 -1.101550  | 130.59 147.54   |

|      |                                 |                 |
|------|---------------------------------|-----------------|
|      | N 2.023769 -0.447511 -0.059460  | 180.01 188.09   |
|      | C 3.095732 -0.799409 -1.007006  | 193.70 229.05   |
|      | H 2.857405 -0.384057 -1.981951  | 264.57 321.32   |
|      | H 4.043426 -0.398536 -0.655319  | 400.11 408.92   |
|      | H 3.158160 -1.882255 -1.079503  | 448.10 527.27   |
|      | C 2.237916 -0.969518 1.306819   | 583.75 592.52   |
|      | H 1.399586 -0.654442 1.920185   | 596.43 814.49   |
|      | H 2.274380 -2.055308 1.260508   | 825.95 916.51   |
|      | H 3.175711 -0.582618 1.698902   | 940.46 964.47   |
|      | S -1.304443 -0.909410 0.042235  | 1058.69 1073.48 |
|      | O -0.278515 -1.374908 -0.906223 | 1080.18 1148.96 |
|      | O -0.723433 -0.019992 1.023062  | 1153.76 1160.11 |
|      | H 1.090924 -0.829672 -0.424289  | 1162.45 1220.65 |
|      | O -2.169679 -1.944807 0.511351  | 1262.20 1293.27 |
|      | C -0.980728 3.063395 0.224514   | 1379.20 1385.63 |
|      | H -0.609171 3.751283 0.978345   | 1444.77 1447.58 |
|      | H -1.730764 2.391651 0.646090   | 1463.52 1471.30 |
|      | H -1.454617 3.604338 -0.595924  | 1472.90 1477.34 |
|      | O -2.233613 0.086404 -0.824078  | 1495.55 1512.67 |
|      | H -2.923885 -0.439960 -1.242974 | 1517.50 1522.71 |
|      |                                 | 1590.55 1703.72 |
|      |                                 | 1816.12 2548.23 |
|      |                                 | 3010.18 3067.21 |
|      |                                 | 3088.56 3090.44 |
|      |                                 | 3133.62 3170.53 |
|      |                                 | 3173.65 3182.84 |
|      |                                 | 3183.79 3194.92 |
|      |                                 | 3211.03 3864.86 |
| TS1B | 0 1                             | -588.74 28.26   |
|      | C -0.041972 1.747773 -0.173552  | 55.62 74.07     |
|      | O 1.136571 1.782238 0.296832    | 80.87 107.32    |
|      | H 1.716102 0.768894 0.013116    | 119.92 148.57   |
|      | H -0.189120 1.268748 -1.146080  | 175.93 191.05   |
|      | N 2.209241 -0.398175 -0.181960  | 201.75 215.60   |
|      | C 3.527621 -0.359500 -0.818996  | 250.17 271.08   |
|      | H 3.449262 0.125403 -1.788966   | 325.11 399.54   |
|      | H 4.207281 0.215591 -0.192595   | 430.83 446.56   |
|      | H 3.932614 -1.363869 -0.949444  | 477.92 523.10   |
|      | C 2.213764 -1.072619 1.125157   | 578.84 586.80   |
|      | H 1.200900 -1.078849 1.520980   | 624.99 695.21   |
|      | H 2.580179 -2.095512 1.035850   | 850.57 922.41   |
|      | H 2.856635 -0.516457 1.805259   | 957.68 1008.13  |
|      | S -1.355372 -0.806170 -0.007303 | 1028.21 1052.03 |
|      | O -0.411560 -1.203110 -1.027576 | 1052.93 1091.95 |
|      | O -0.882814 0.383421 0.746772   | 1153.43 1158.81 |
|      | H 1.521890 -0.865409 -0.775365  | 1167.90 1210.11 |
|      | O -1.839222 -1.838928 0.844804  | 1265.03 1281.57 |
|      | C -0.977631 2.857883 0.170806   | 1294.48 1378.33 |
|      | H -0.917538 3.065308 1.236130   | 1383.98 1408.03 |
|      | H -1.996341 2.604530 -0.108402  | 1450.23 1469.24 |
|      | H -0.659133 3.744352 -0.380401  | 1471.73 1486.86 |
|      | O -2.600123 -0.169602 -0.785750 | 1489.99 1497.80 |

|      |                                                                                                                                                                                                                                                                                                                                                                                                                                                                                                                                                                                                                                                                                                                                                                                                                                            |                                                                                                                                                                                                                                                                                                                                                                                                                                                                                                                                                                                                                |
|------|--------------------------------------------------------------------------------------------------------------------------------------------------------------------------------------------------------------------------------------------------------------------------------------------------------------------------------------------------------------------------------------------------------------------------------------------------------------------------------------------------------------------------------------------------------------------------------------------------------------------------------------------------------------------------------------------------------------------------------------------------------------------------------------------------------------------------------------------|----------------------------------------------------------------------------------------------------------------------------------------------------------------------------------------------------------------------------------------------------------------------------------------------------------------------------------------------------------------------------------------------------------------------------------------------------------------------------------------------------------------------------------------------------------------------------------------------------------------|
|      | H -3.034981 -0.860157 -1.300670                                                                                                                                                                                                                                                                                                                                                                                                                                                                                                                                                                                                                                                                                                                                                                                                            | 1513.50 1516.47<br>1520.67 1565.38<br>1621.70 1746.94<br>3066.48 3069.32<br>3074.40 3077.93<br>3138.58 3144.08<br>3155.41 3164.10<br>3171.46 3189.08<br>3453.59 3850.74                                                                                                                                                                                                                                                                                                                                                                                                                                        |
| C1C  | 0 1<br>C -0.060274 2.237836 0.292284<br>O -1.200191 2.254861 -0.120111<br>H -1.822827 0.551259 -0.100193<br>H 0.208764 1.590772 1.144343<br>N -2.017004 -0.455648 0.027316<br>C -3.111493 -0.629682 0.998375<br>H -2.839519 -0.136674 1.927259<br>H -4.025397 -0.193590 0.602158<br>H -3.257712 -1.691685 1.178309<br>C -2.268703 -1.087616 -1.284031<br>H -1.401230 -0.908260 -1.911296<br>H -2.406179 -2.155661 -1.133537<br>H -3.164759 -0.658194 -1.726199<br>S 1.294591 -0.745577 0.094515<br>O 0.276612 -1.309603 0.995644<br>O 2.296539 0.019949 0.782831<br>O 0.672888 -0.104254 -1.042004<br>H -1.111267 -0.853232 0.433322<br>O 2.046067 -2.005879 -0.538065<br>H 2.764356 -2.255552 0.054103<br>C 1.055518 3.038212 -0.274767<br>H 0.715232 3.651171 -1.104124<br>H 1.823548 2.331400 -0.595709<br>H 1.496958 3.653916 0.510583 | 27.37 48.97<br>52.89 68.36<br>94.20 106.02<br>113.51 118.25<br>127.79 142.74<br>153.36 186.58<br>191.20 222.12<br>256.44 315.00<br>402.43 408.36<br>447.19 524.42<br>584.27 593.59<br>598.61 815.08<br>855.88 915.38<br>942.12 959.86<br>1057.43 1071.22<br>1086.46 1148.75<br>1155.87 1158.61<br>1166.58 1218.85<br>1262.80 1293.03<br>1355.00 1383.54<br>1439.14 1446.14<br>1462.48 1467.21<br>1467.67 1474.99<br>1495.51 1511.76<br>1515.71 1522.75<br>1581.90 1707.21<br>1816.07 2592.34<br>2999.76 3065.13<br>3089.28 3091.37<br>3130.03 3171.44<br>3174.68 3184.32<br>3184.48 3195.97<br>3234.30 3866.40 |
| TS1C | 0 1<br>C -0.010209 1.747186 0.173552<br>O -1.183659 1.796034 -0.312447<br>H -1.745162 0.770055 -0.037693<br>H 0.109884 1.296441 1.165400<br>N -2.193841 -0.417725 0.145211<br>C -3.480072 -0.442659 0.845794<br>H -3.367397 0.005275 1.830033<br>H -4.205425 0.136484 0.276965<br>H -3.850114 -1.462927 0.954724                                                                                                                                                                                                                                                                                                                                                                                                                                                                                                                           | -616.70 31.11<br>52.83 71.91<br>87.76 104.68<br>116.16 150.60<br>178.79 193.40<br>221.76 226.82<br>251.28 265.06<br>330.67 398.67<br>420.95 444.97<br>478.68 523.44                                                                                                                                                                                                                                                                                                                                                                                                                                            |

|     |                                 |                 |
|-----|---------------------------------|-----------------|
|     | C -2.241790 -1.042653 -1.185029 | 565.91 604.96   |
|     | H -1.245376 -1.004204 -1.617980 | 624.89 691.93   |
|     | H -2.577041 -2.077959 -1.117956 | 879.41 919.71   |
|     | H -2.929233 -0.480114 -1.814603 | 958.20 1019.99  |
|     | S 1.411974 -0.681180 0.179388   | 1027.09 1048.59 |
|     | O 0.408690 -1.456280 0.855050   | 1052.23 1092.14 |
|     | O 2.462182 -0.121135 0.972053   | 1158.11 1162.58 |
|     | O 0.787754 0.349701 -0.712384   | 1169.55 1205.84 |
|     | H -1.469542 -0.896934 0.684041  | 1265.36 1282.75 |
|     | O 2.059443 -1.696217 -0.852760  | 1297.87 1369.73 |
|     | H 2.908715 -1.343957 -1.145385  | 1389.06 1407.22 |
|     | C 0.954706 2.834670 -0.160345   | 1447.94 1468.27 |
|     | H 0.921392 3.033551 -1.228579   | 1471.93 1485.60 |
|     | H 1.959459 2.558685 0.147675    | 1488.15 1496.80 |
|     | H 0.644048 3.732463 0.376746    | 1514.59 1516.48 |
|     |                                 | 1520.19 1560.86 |
|     |                                 | 1618.87 1757.46 |
|     |                                 | 3049.23 3066.35 |
|     |                                 | 3068.50 3075.71 |
|     |                                 | 3138.35 3142.53 |
|     |                                 | 3153.68 3163.86 |
|     |                                 | 3173.42 3187.13 |
|     |                                 | 3436.62 3852.22 |
| C1D | 0 1                             | 22.44 40.74     |
|     | C -0.514656 2.468597 -0.559799  | 45.94 75.23     |
|     | O -1.534265 2.067653 -0.042865  | 86.12 99.20     |
|     | H -1.749280 0.244768 -0.187037  | 105.82 122.51   |
|     | N -1.877216 -0.738215 0.084953  | 139.28 154.16   |
|     | C -2.963486 -0.833546 1.074573  | 179.70 185.78   |
|     | H -2.739246 -0.168175 1.902946  | 191.76 224.58   |
|     | H -3.904036 -0.541258 0.613549  | 241.29 309.60   |
|     | H -3.029180 -1.858806 1.429844  | 399.95 407.10   |
|     | C -2.074458 -1.569130 -1.119121 | 449.91 522.22   |
|     | H -1.217287 -1.421220 -1.769650 | 583.86 592.64   |
|     | H -2.134624 -2.611530 -0.816609 | 598.21 792.42   |
|     | H -2.993047 -1.273543 -1.620800 | 832.36 915.28   |
|     | S 1.409314 -0.769711 -0.029167  | 938.12 942.82   |
|     | O 0.498508 -1.484482 0.877500   | 1053.42 1071.74 |
|     | O 0.666308 0.090029 -0.927698   | 1083.56 1146.81 |
|     | H -0.939793 -1.028550 0.515573  | 1151.34 1155.71 |
|     | O 2.419554 -1.601090 -0.604454  | 1162.80 1214.95 |
|     | O 2.183523 0.285346 0.908424    | 1262.64 1292.58 |
|     | H 2.950064 -0.161008 1.285577   | 1374.92 1386.82 |
|     | C 0.589145 3.138600 0.179151    | 1442.63 1445.92 |
|     | H 1.473931 2.505161 0.087211    | 1457.36 1465.62 |
|     | H 0.816125 4.097640 -0.288807   | 1472.32 1474.95 |
|     | H 0.332322 3.270315 1.226362    | 1492.50 1509.43 |
|     | H -0.362748 2.342315 -1.642241  | 1514.28 1521.13 |
|     |                                 | 1568.02 1697.48 |
|     |                                 | 1818.40 2563.98 |
|     |                                 | 3020.79 3064.97 |
|     |                                 | 3089.36 3091.95 |



|      |             |           |           |
|------|-------------|-----------|-----------|
|      |             | 3132.48   | 3173.65   |
|      |             | 3173.90   | 3180.97   |
|      |             | 3188.03   | 3190.50   |
|      |             | 3339.47   | 3863.43   |
| TS1D | 0 1         | -506.50   | 29.48     |
|      | C -0.069796 | 1.733802  | -0.782206 |
|      | O -1.090697 | 1.100936  | -1.172752 |
|      | H -1.666730 | 0.347720  | -0.368947 |
|      | N -2.276550 | -0.506789 | 0.287372  |
|      | C -3.529975 | 0.012476  | 0.838613  |
|      | H -3.315582 | 0.847288  | 1.501990  |
|      | H -4.153725 | 0.365279  | 0.019468  |
|      | H -4.069146 | -0.758853 | 1.389027  |
|      | C -2.454220 | -1.652860 | -0.617426 |
|      | H -1.470584 | -1.990142 | -0.931623 |
|      | H -2.986017 | -2.463855 | -0.119832 |
|      | H -3.022238 | -1.325067 | -1.485906 |
|      | S 1.616525  | -0.531369 | 0.011658  |
|      | O 0.378687  | -0.988160 | 0.584138  |
|      | O 1.403888  | 0.616888  | -0.910619 |
|      | H -1.616883 | -0.770566 | 1.015448  |
|      | O 2.496737  | -1.499994 | -0.552773 |
|      | O 2.379628  | 0.106622  | 1.269009  |
|      | H 3.325107  | 0.099043  | 1.079806  |
|      | C 0.042324  | 2.189056  | 0.645717  |
|      | H 1.043386  | 2.547882  | 0.865712  |
|      | H -0.670223 | 3.005005  | 0.781668  |
|      | H -0.204350 | 1.380838  | 1.332302  |
|      | H 0.402489  | 2.379683  | -1.521457 |
|      |             | 1512.39   | 1517.35   |
|      |             | 1520.33   | 1581.46   |
|      |             | 1622.43   | 1715.35   |
|      |             | 3069.67   | 3070.65   |
|      |             | 3072.97   | 3118.83   |
|      |             | 3143.54   | 3146.71   |
|      |             | 3148.74   | 3163.60   |
|      |             | 3183.16   | 3183.92   |
|      |             | 3517.82   | 3859.18   |
| C1E  | 0 1         | 27.37     | 48.97     |
|      | C -0.060281 | 2.237817  | 0.292310  |
|      | O -1.200199 | 2.254864  | -0.120081 |
|      | H -1.822881 | 0.551299  | -0.100074 |
|      | H 0.208758  | 1.590718  | 1.144342  |
|      | N -2.017012 | -0.455632 | 0.027330  |
|      | C -3.111467 | -0.629831 | 0.998396  |
|      | H -2.839483 | -0.136939 | 1.927339  |
|      | H -4.025399 | -0.193721 | 0.602263  |
|      | H -3.257643 | -1.691863 | 1.178195  |
|      | C -2.268719 | -1.087451 | -1.284087 |
|      | H -1.401270 | -0.907984 | -1.911354 |
|      | H -2.406141 | -2.155522 | -1.133718 |
|      | H -3.164807 | -0.658018 | -1.726178 |
|      | S 1.294595  | -0.745579 | 0.094500  |
|      |             | 1057.43   | 1071.22   |

|      |                                 |                 |
|------|---------------------------------|-----------------|
|      | O 0.276600 -1.309613 0.995609   | 1086.46 1148.75 |
|      | O 2.296531 0.01993 0.782844     | 1155.87 1158.61 |
|      | O 0.672915 -0.104240 -1.042020  | 1166.58 1218.86 |
|      | H -1.111248 -0.853227 0.433275  | 1262.81 1293.03 |
|      | O 2.046073 -2.005874 -0.538090  | 1355.00 1383.54 |
|      | H 2.764312 -2.255603 0.054114   | 1439.14 1446.14 |
|      | C 1.055514 3.038210 -0.274712   | 1462.48 1467.22 |
|      | H 0.715227 3.651206 -1.104042   | 1467.67 1474.99 |
|      | H 1.823538 2.331407 -0.595689   | 1495.51 1511.76 |
|      | H 1.496961 3.653877 0.510662    | 1515.72 1522.75 |
|      |                                 | 1581.90 1707.21 |
|      |                                 | 1816.08 2592.29 |
|      |                                 | 2999.76 3065.13 |
|      |                                 | 3089.28 3091.36 |
|      |                                 | 3130.03 3171.44 |
|      |                                 | 3174.68 3184.32 |
|      |                                 | 3184.48 3195.96 |
|      |                                 | 3234.26 3866.39 |
| TS1E | 0 1                             | -541.34 40.07   |
|      | C -0.015788 1.729291 0.391771   | 65.59 85.04     |
|      | O -0.725819 1.415532 -0.608980  | 89.30 110.12    |
|      | H -1.557749 0.556358 -0.385085  | 128.35 156.92   |
|      | H -0.478219 1.709818 1.381867   | 165.05 188.75   |
|      | N -2.316929 -0.429063 -0.167440 | 212.67 217.61   |
|      | C -2.333804 -0.697148 1.277193  | 260.97 269.11   |
|      | H -1.307831 -0.816168 1.618555  | 326.20 385.87   |
|      | H -2.795510 0.147063 1.787772   | 417.06 430.40   |
|      | H -2.901892 -1.600283 1.502180  | 488.78 540.52   |
|      | C -3.649978 -0.273942 -0.752977 | 570.70 608.62   |
|      | H -3.556773 -0.100363 -1.821961 | 612.57 669.26   |
|      | H -4.261814 -1.160358 -0.580991 | 850.97 926.89   |
|      | H -4.139674 0.585361 -0.298226  | 951.54 961.95   |
|      | S 1.382540 -0.821366 0.000555   | 985.38 1038.30  |
|      | O 0.211022 -1.467730 -0.517784  | 1048.62 1092.89 |
|      | O 2.412217 -1.639306 0.553962   | 1152.18 1161.85 |
|      | O 1.024612 0.291505 0.930384    | 1174.50 1200.91 |
|      | H -1.785008 -1.169747 -0.622075 | 1267.71 1273.00 |
|      | O 2.020130 -0.078441 -1.264770  | 1277.99 1377.42 |
|      | H 2.979069 -0.121794 -1.174694  | 1401.09 1404.65 |
|      | C 1.069042 2.736695 0.188558    | 1446.77 1463.02 |
|      | H 1.612883 2.495545 -0.721343   | 1469.83 1485.76 |
|      | H 1.741761 2.765840 1.040228    | 1490.01 1499.32 |
|      | H 0.594489 3.712175 0.067197    | 1515.51 1519.29 |
|      |                                 | 1523.29 1595.60 |
|      |                                 | 1624.06 1714.79 |
|      |                                 | 3065.22 3068.00 |
|      |                                 | 3073.28 3077.74 |
|      |                                 | 3136.23 3139.73 |
|      |                                 | 3154.63 3167.29 |
|      |                                 | 3168.92 3192.14 |
|      |                                 | 3496.69 3862.01 |
| CIF  | 0 1                             | 21.32 38.65     |

|      |     |           |           |           |         |         |
|------|-----|-----------|-----------|-----------|---------|---------|
|      | C   | -1.021090 | 2.405262  | -0.540354 | 47.08   | 63.97   |
|      | O   | -1.998875 | 1.700080  | -0.649441 | 78.31   | 98.87   |
|      | H   | -1.840515 | 0.011118  | -0.051234 | 107.30  | 113.53  |
|      | N   | -1.687926 | -0.989051 | 0.150255  | 122.99  | 129.57  |
|      | C   | -2.663886 | -1.464657 | 1.145279  | 148.55  | 180.48  |
|      | H   | -2.569445 | -0.867663 | 2.047830  | 202.19  | 217.01  |
|      | H   | -3.670518 | -1.372236 | 0.744429  | 237.96  | 313.32  |
|      | H   | -2.453314 | -2.506002 | 1.375367  | 400.42  | 408.08  |
|      | C   | -1.715374 | -1.736606 | -1.124145 | 451.52  | 527.04  |
|      | H   | -0.964835 | -1.302427 | -1.777383 | 576.05  | 588.24  |
|      | H   | -1.478557 | -2.778254 | -0.921305 | 612.33  | 781.21  |
|      | H   | -2.705514 | -1.658439 | -1.567201 | 847.59  | 917.51  |
|      | S   | 1.546642  | -0.263668 | 0.069488  | 941.51  | 951.88  |
|      | O   | 0.779903  | -1.059715 | 1.032704  | 1056.70 | 1072.96 |
|      | O   | 2.453211  | 0.685575  | 0.648572  | 1088.77 | 1138.32 |
|      | O   | 0.675707  | 0.268611  | -0.962599 | 1150.96 | 1153.63 |
|      | H   | -0.697112 | -1.047245 | 0.550754  | 1156.68 | 1228.45 |
|      | O   | 2.460449  | -1.373967 | -0.636733 | 1262.26 | 1294.67 |
|      | H   | 3.283922  | -0.951838 | -0.904747 | 1351.39 | 1394.03 |
|      | C   | -0.255432 | 2.604898  | 0.720587  | 1435.80 | 1445.58 |
|      | H   | -0.442101 | 3.621841  | 1.075917  | 1460.15 | 1468.80 |
|      | H   | -0.559720 | 1.890521  | 1.483167  | 1473.76 | 1477.19 |
|      | H   | 0.812542  | 2.506185  | 0.527512  | 1493.69 | 1511.31 |
|      | H   | -0.674082 | 2.978434  | -1.414902 | 1515.09 | 1522.08 |
|      |     |           |           |           | 1584.72 | 1698.32 |
|      |     |           |           |           | 1821.25 | 2577.34 |
|      |     |           |           |           | 3007.73 | 3056.38 |
|      |     |           |           |           | 3089.42 | 3091.12 |
|      |     |           |           |           | 3130.44 | 3166.51 |
|      |     |           |           |           | 3172.37 | 3174.17 |
|      |     |           |           |           | 3183.08 | 3196.51 |
|      |     |           |           |           | 3261.23 | 3872.52 |
| TS1F | O 1 |           |           |           | -638.81 | 36.26   |
|      | C   | 0.148470  | 1.827597  | 0.700369  | 46.35   | 74.73   |
|      | O   | 1.321852  | 1.450988  | 1.030763  | 78.96   | 107.10  |
|      | H   | 1.738241  | 0.576530  | 0.342040  | 120.54  | 152.85  |
|      | N   | 2.100090  | -0.520372 | -0.241957 | 183.22  | 195.80  |
|      | C   | 3.424056  | -0.424837 | -0.858644 | 227.87  | 250.56  |
|      | H   | 3.412558  | 0.343839  | -1.627954 | 262.66  | 307.00  |
|      | H   | 4.150622  | -0.146980 | -0.096946 | 362.86  | 392.49  |
|      | H   | 3.724751  | -1.374667 | -1.303245 | 420.24  | 457.09  |
|      | C   | 2.007196  | -1.561171 | 0.791649  | 484.37  | 503.54  |
|      | H   | 0.988776  | -1.578571 | 1.172555  | 557.55  | 600.70  |
|      | H   | 2.267090  | -2.540444 | 0.388285  | 621.86  | 677.38  |
|      | H   | 2.687501  | -1.311190 | 1.604016  | 872.69  | 908.30  |
|      | S   | -1.547697 | -0.395032 | -0.170716 | 955.38  | 991.69  |
|      | O   | -0.583860 | -0.891548 | -1.112441 | 1004.16 | 1028.71 |
|      | O   | -2.696278 | 0.277485  | -0.688550 | 1051.11 | 1092.25 |
|      | O   | -0.889661 | 0.374897  | 0.936904  | 1146.38 | 1164.32 |
|      | H   | 1.374440  | -0.706724 | -0.933887 | 1170.33 | 1206.12 |
|      | O   | -2.049781 | -1.695996 | 0.589621  | 1262.59 | 1266.23 |
|      | H   | -2.886773 | -1.497424 | 1.026643  | 1286.16 | 1381.47 |

|     |                                                                                                                                                                                                                                                                                                                                                                                                                                                                                                                                                                                                                                                                                                                                                                                                                                           |                                                                                                                                                                                                                                                                                                                                                                                                                                                                                                                                                                                                                |
|-----|-------------------------------------------------------------------------------------------------------------------------------------------------------------------------------------------------------------------------------------------------------------------------------------------------------------------------------------------------------------------------------------------------------------------------------------------------------------------------------------------------------------------------------------------------------------------------------------------------------------------------------------------------------------------------------------------------------------------------------------------------------------------------------------------------------------------------------------------|----------------------------------------------------------------------------------------------------------------------------------------------------------------------------------------------------------------------------------------------------------------------------------------------------------------------------------------------------------------------------------------------------------------------------------------------------------------------------------------------------------------------------------------------------------------------------------------------------------------|
|     | C -0.127214 2.251894 -0.714147<br>H 0.359479 3.219537 -0.845730<br>H 0.298352 1.548589 -1.428002<br>H -1.192655 2.358212 -0.901170<br>H -0.393082 2.384918 1.462812                                                                                                                                                                                                                                                                                                                                                                                                                                                                                                                                                                                                                                                                       | 1392.71 1410.95<br>1448.58 1461.27<br>1474.30 1487.16<br>1490.05 1496.73<br>1509.86 1514.59<br>1519.86 1538.13<br>1598.06 1709.81<br>3064.12 3067.08<br>3074.35 3127.16<br>3136.16 3142.23<br>3149.27 3161.09<br>3171.06 3179.83<br>3472.46 3851.90                                                                                                                                                                                                                                                                                                                                                            |
| CP1 | 0 1<br>C -0.344326 1.587868 -0.109146<br>O 0.881150 1.850104 0.384552<br>H 1.507814 1.109341 0.115167<br>H -0.326005 1.245105 -1.147071<br>N 2.387109 -0.285666 -0.235318<br>C 3.754211 -0.060208 -0.690067<br>H 3.744873 0.470525 -1.639903<br>H 4.276293 0.557510 0.040663<br>H 4.315366 -0.993087 -0.810533<br>C 2.332026 -1.053022 1.007220<br>H 1.294817 -1.241587 1.278493<br>H 2.857167 -2.010443 0.930141<br>H 2.791633 -0.469622 1.805189<br>S -1.297889 -0.878875 -0.053893<br>O -0.347365 -1.179724 -1.066706<br>O -0.924104 0.429774 0.670834<br>H 1.851689 -0.773847 -0.944595<br>O -1.635569 -1.823750 0.946405<br>C -1.285870 2.739763 0.109112<br>H -1.318609 2.978821 1.170252<br>H -2.284435 2.491147 -0.244165<br>H -0.915766 3.604817 -0.437295<br>O -2.612123 -0.483332 -0.842904<br>H -3.370538 -0.538000 -0.246989 | 36.01 51.80<br>56.00 72.40<br>96.52 108.78<br>129.28 180.11<br>203.05 211.20<br>247.23 274.95<br>298.41 333.47<br>378.14 414.17<br>423.49 468.94<br>505.42 547.44<br>575.00 616.52<br>767.76 884.00<br>897.65 923.53<br>963.43 977.08<br>1040.41 1059.73<br>1071.35 1111.09<br>1151.44 1166.45<br>1194.05 1218.68<br>1233.04 1271.10<br>1273.32 1389.21<br>1420.64 1426.93<br>1449.55 1462.28<br>1476.55 1480.43<br>1489.53 1494.97<br>1495.98 1508.00<br>1521.27 1524.58<br>1597.55 2936.66<br>3027.67 3035.32<br>3076.36 3083.77<br>3105.81 3109.62<br>3147.82 3152.27<br>3167.02 3169.18<br>3554.86 3837.04 |
| P1  | 0 1<br>C -1.497256 0.018815 0.252084<br>O -1.846748 -1.259818 -0.091260<br>H -1.155115 -1.864728 0.202046<br>H -1.194247 0.097894 1.299414<br>S 1.064025 -0.058849 -0.089161                                                                                                                                                                                                                                                                                                                                                                                                                                                                                                                                                                                                                                                              | 71.17 107.20<br>197.64 235.05<br>282.70 328.90<br>376.92 396.33<br>477.37 489.10<br>529.05 558.98                                                                                                                                                                                                                                                                                                                                                                                                                                                                                                              |

|                                                                         |                                 |                 |
|-------------------------------------------------------------------------|---------------------------------|-----------------|
|                                                                         | O 0.925032 -1.362003 0.458753   | 613.42 638.05   |
|                                                                         | O -0.332901 0.458158 -0.541907  | 812.71 895.59   |
|                                                                         | O 1.973809 0.239780 -1.128355   | 928.56 963.12   |
|                                                                         | C -2.609423 0.963728 -0.102911  | 1069.02 1125.44 |
|                                                                         | H -2.824743 0.876470 -1.165960  | 1165.06 1211.96 |
|                                                                         | H -2.328131 1.987555 0.129958   | 1261.15 1320.55 |
|                                                                         | H -3.496998 0.692001 0.463654   | 1408.17 1410.05 |
|                                                                         | O 1.385627 0.868961 1.148317    | 1471.79 1488.71 |
|                                                                         | H 1.776359 1.696510 0.838047    | 1495.48 1501.70 |
|                                                                         |                                 | 3074.65 3089.79 |
|                                                                         |                                 | 3173.26 3177.70 |
|                                                                         |                                 | 3834.04 3834.63 |
| (CH <sub>3</sub> ) <sub>2</sub> NH<br>...H <sub>2</sub> SO <sub>4</sub> | O 1                             | -42.92 36.60    |
|                                                                         | H -1.023840 -0.027709 -0.543349 | 75.81 101.47    |
|                                                                         | O 0.329679 -0.108074 -1.109677  | 159.84 195.29   |
|                                                                         | S 1.281861 -0.124493 0.023401   | 196.28 229.04   |
|                                                                         | O 1.985489 1.312959 -0.021673   | 327.91 393.62   |
|                                                                         | O 0.563097 -0.107867 1.279915   | 406.03 459.41   |
|                                                                         | O 2.326346 -1.086250 -0.129002  | 582.18 595.69   |
|                                                                         | H -1.409476 -0.010820 1.019634  | 610.15 846.68   |
|                                                                         | N -1.900374 0.007193 0.118546   | 874.78 947.19   |
|                                                                         | H 2.797320 1.228488 -0.533845   | 1053.08 1060.01 |
|                                                                         | C -2.627985 1.274081 -0.056969  | 1073.84 1154.92 |
|                                                                         | H -1.930420 2.095381 0.082141   | 1161.75 1174.61 |
|                                                                         | H -3.034381 1.308724 -1.064679  | 1262.84 1269.19 |
|                                                                         | H -3.436993 1.344489 0.666928   | 1382.08 1449.35 |
|                                                                         | C -2.717386 -1.204571 -0.055736 | 1462.73 1472.73 |
|                                                                         | H -3.124208 -1.211372 -1.063835 | 1497.77 1512.14 |
|                                                                         | H -2.080172 -2.073236 0.084656  | 1513.78 1517.62 |
|                                                                         | H -3.529656 -1.215604 0.667827  | 1586.73 1681.73 |
|                                                                         |                                 | 2256.63 3087.29 |
|                                                                         |                                 | 3088.54 3169.81 |
|                                                                         |                                 | 3170.64 3182.60 |
|                                                                         |                                 | 3183.64 3398.06 |
|                                                                         |                                 | 3869.29         |
| CH <sub>3</sub> CHO<br>...<br>(CH <sub>3</sub> ) <sub>2</sub> NH        | O 1                             | 36.60 55.51     |
|                                                                         | N -1.383071 -0.138174 0.129751  | 75.89 84.17     |
|                                                                         | H -0.926589 -0.703575 -0.575893 | 118.93 133.01   |
|                                                                         | C -2.725199 -0.627112 0.387071  | 166.85 221.48   |
|                                                                         | H -2.693325 -1.684400 0.645062  | 275.69 398.48   |
|                                                                         | H -3.148620 -0.087425 1.235767  | 520.07 791.30   |
|                                                                         | H -3.407663 -0.495681 -0.464410 | 842.32 905.53   |
|                                                                         | C -1.377460 1.250558 -0.295272  | 970.90 1042.00  |
|                                                                         | H -1.713471 1.882424 0.528826   | 1107.82 1138.61 |
|                                                                         | H -0.365781 1.548869 -0.566842  | 1159.21 1194.77 |
|                                                                         | H -2.034516 1.444748 -1.154489  | 1203.07 1272.66 |
|                                                                         | C 2.831689 0.359204 0.594999    | 1384.13 1441.02 |
|                                                                         | H 3.523463 -0.263833 1.164181   | 1442.49 1467.82 |
|                                                                         | H 2.447194 1.115383 1.282246    | 1471.28 1476.73 |
|                                                                         | H 3.345716 0.832507 -0.236825   | 1484.41 1494.49 |

|                                |                                 |                 |
|--------------------------------|---------------------------------|-----------------|
|                                | C 1.688933 -0.477569 0.106542   | 1505.06 1523.60 |
|                                | H 1.105958 -1.001469 0.883289   | 1525.39 1849.34 |
|                                | O 1.380169 -0.581352 -1.051151  | 2979.82 2984.59 |
|                                |                                 | 2986.95 3063.88 |
|                                |                                 | 3080.17 3083.76 |
|                                |                                 | 3126.30 3132.93 |
|                                |                                 | 3134.76 3179.21 |
|                                |                                 | 3558.49         |
| CH <sub>3</sub> CHO ...        | 0 1                             | 31.53 64.71     |
| H <sub>2</sub> SO <sub>4</sub> | S 1.183922 -0.207178 -0.043669  | 90.76 128.12    |
|                                | O 2.467173 -0.644161 -0.444342  | 171.12 201.92   |
|                                | O 0.116848 -1.110912 0.199906   | 224.25 262.21   |
|                                | O 0.742607 0.873493 -1.070020   | 397.05 438.62   |
|                                | H -0.193018 1.130959 -0.914830  | 531.93 536.68   |
|                                | O 1.318010 0.622025 1.293970    | 566.13 576.92   |
|                                | H 2.148650 1.115674 1.289759    | 782.44 880.73   |
|                                | C -3.022290 -0.857964 -0.134797 | 916.33 940.14   |
|                                | H -4.004323 -0.921664 0.336558  | 971.64 1150.58  |
|                                | H -2.471916 -1.762593 0.130043  | 1161.28 1166.74 |
|                                | H -3.118463 -0.778548 -1.213634 | 1252.27 1362.42 |
|                                | C -2.277143 0.305170 0.419754   | 1391.91 1439.50 |
|                                | H -2.151266 0.327068 1.515236   | 1455.32 1473.57 |
|                                | O -1.814114 1.199644 -0.248784  | 1491.11 1823.96 |
|                                |                                 | 2966.58 3020.81 |
|                                |                                 | 3067.55 3131.84 |
|                                |                                 | 3186.06 3840.96 |
